# Supplementary material for: A theoretical study on the palladium-catalyzed oxidative carbocyclization–alkoxycarbonylation of bisallenes to construct seven-membered carbocycles assisted by olefins
Source: Royal Society of Chemistry journal article supplement (doi:10.1039/c7ob01161j), 2017-01-01
Supplement: c7ob01161j1.pdf [file c7ob01161j1.pdf]

*Supporting Information*

**Theoretical study on the palladium-catalyzed oxidative carbocyclization-alkoxycarbonylation of bisallenes to construct seven-membered carbocycles assisted by olefin**

**Lingli Han<sup>a</sup> and Tao Liu<sup>a,b,\*</sup>**

<sup>a</sup> *Department of Chemistry and Chemical Engineering, Jining University, Qufu 273155, Shandong, China*

<sup>b</sup> *School of Chemistry and Chemical Engineering, Qufu Normal University, Qufu 273165, Shandong, China*

---

\* Corresponding author.  
E-mail address: liutao\_2005@126.com

## Cartesian coordinates and SCF energies for all of the calculated structures

|           |                                                           |             |             |           |                                                           |             |             |
|-----------|-----------------------------------------------------------|-------------|-------------|-----------|-----------------------------------------------------------|-------------|-------------|
| <b>1a</b> |                                                           |             |             | H         | -4.47879200                                               | -1.88806000 | 1.68505200  |
|           |                                                           |             |             | H         | -3.51409000                                               | -3.26004100 | 1.17626900  |
|           | Sum of electronic and thermal Free Energies= -1474.522452 |             |             | C         | -5.90197600                                               | -3.31894500 | -0.20675100 |
| C         | 0.71927000                                                | -0.95893200 | -0.31314500 | H         | -5.05758300                                               | -1.39097600 | -0.70227900 |
| C         | 0.56971600                                                | -1.17398500 | -1.65277600 | H         | -4.08336500                                               | -2.75369900 | -1.23073100 |
| C         | 1.19043800                                                | -1.27762600 | 0.88238500  | H         | -6.49990600                                               | -3.39257800 | -1.11988300 |
| C         | 2.42825700                                                | -2.16991000 | 0.93921400  | H         | -5.57895700                                               | -4.33120400 | 0.06201200  |
| H         | 2.39122300                                                | -2.80698200 | 1.83037300  | H         | -6.55947700                                               | -2.95846900 | 0.59220800  |
| H         | 2.50865400                                                | -2.80371500 | 0.05463700  | Pd        | -0.63947200                                               | 0.75438600  | -0.60965100 |
| C         | 3.66720600                                                | -1.28170200 | 1.04588700  | O         | 2.85141900                                                | 1.24961700  | -0.81547000 |
| O         | 3.85387100                                                | -0.48708000 | 1.94534700  | C         | 2.18675600                                                | 1.94622700  | -0.04192300 |
| O         | 4.50205400                                                | -1.48436200 | 0.01753700  | O         | 0.89343000                                                | 1.95842200  | 0.09992800  |
| C         | 5.62598700                                                | -0.56738400 | -0.08079800 | C         | 2.89976600                                                | 2.91565200  | 0.89983100  |
| C         | 6.56890800                                                | -1.11575400 | -1.13488200 | H         | 3.58356600                                                | 3.53921100  | 0.31733600  |
| H         | 6.10382400                                                | -0.49120900 | 0.89934500  | H         | 2.20229400                                                | 3.54490500  | 1.45402800  |
| H         | 5.21425100                                                | 0.40923700  | -0.35150800 | H         | 3.50088100                                                | 2.32287100  | 1.59678900  |
| H         | 7.43962100                                                | -0.45908000 | -1.22760600 | C         | 1.31988700                                                | -0.45758000 | -2.74752400 |
| H         | 6.92310000                                                | -2.11553400 | -0.86433100 | H         | 0.64818200                                                | -0.17811100 | -3.56675100 |
| H         | 6.07974600                                                | -1.17327100 | -2.11151300 | H         | 1.87060600                                                | 0.39988700  | -2.36371800 |
| C         | 0.71632200                                                | -0.68710400 | 2.19794000  | H         | 2.04279100                                                | -1.17781200 | -3.15962700 |
| H         | 1.36201600                                                | 0.15799000  | 2.45525200  | C         | -2.70920200                                               | 2.83927800  | -0.10017000 |
| H         | 0.90055800                                                | -1.44416200 | 2.97495300  | O         | -3.43775700                                               | 2.03279900  | 0.47479200  |
| C         | -0.73937500                                               | -0.27775000 | 2.25169200  | O         | -1.58091400                                               | 2.57487000  | -0.70762100 |
| C         | -1.10492700                                               | 0.97505200  | 2.54360900  | C         | -3.05111400                                               | 4.32759600  | -0.15611900 |
| H         | -2.14946300                                               | 1.26832300  | 2.59723300  | H         | -2.45041400                                               | 4.85529600  | 0.59237200  |
| H         | -0.36357600                                               | 1.75760200  | 2.66753100  | H         | -2.80887300                                               | 4.75288600  | -1.13263200 |
| C         | -0.23038800                                               | -2.38025200 | -2.10369000 | H         | -4.10853900                                               | 4.46845100  | 0.07319200  |
| H         | -0.97447200                                               | -2.68656900 | -1.36833100 | <b>1b</b> |                                                           |             |             |
| H         | -0.70855000                                               | -2.21446200 | -3.07404000 |           | Sum of electronic and thermal Free Energies= -1474.536007 |             |             |
| H         | 0.47933900                                                | -3.20849300 | -2.23685600 | C         | -0.07623000                                               | -1.81439100 | 0.40047200  |
| C         | -1.77875100                                               | -1.37385500 | 2.06414800  | C         | -0.93033000                                               | -2.75004100 | -0.07224200 |
| H         | -1.30043000                                               | -2.36177500 | 2.12540300  | C         | 1.08116700                                                | -1.32182700 | 0.80681500  |
| H         | -2.48448900                                               | -1.34273500 | 2.90503100  | C         | 2.23402200                                                | -2.23773400 | 1.15683100  |
| C         | -2.62192700                                               | -1.35713400 | 0.79752500  | H         | 2.66188400                                                | -1.98408600 | 2.13547000  |
| C         | -2.39603800                                               | -0.64771700 | -0.28390600 | H         | 1.90518500                                                | -3.27912100 | 1.23036200  |
| C         | -2.48637400                                               | -0.08860400 | -1.51609200 | C         | 3.35291900                                                | -2.17109300 | 0.12120600  |
| H         | -2.15207400                                               | -0.61856000 | -2.40308200 | O         | 3.30406200                                                | -1.55579600 | -0.92367100 |
| H         | -3.11626100                                               | 0.78143800  | -1.66587800 | O         | 4.40988000                                                | -2.90038800 | 0.51945700  |
| C         | -3.85241800                                               | -2.26096700 | 0.86155100  | C         | 5.53924900                                                | -2.93832400 | -0.39097900 |
| C         | -4.70376400                                               | -2.38468600 | -0.40474200 |           |                                                           |             |             |

|    |             |             |             |                                              |              |             |             |
|----|-------------|-------------|-------------|----------------------------------------------|--------------|-------------|-------------|
| C  | 6.59763700  | -3.82639100 | 0.23343800  | C                                            | 1.91276800   | 3.67393200  | -0.93974700 |
| H  | 5.89624500  | -1.91563200 | -0.54653700 | C                                            | 3.19650100   | 4.50955200  | -0.96754500 |
| H  | 5.19665400  | -3.31928500 | -1.35782600 | H                                            | 1.09892300   | 4.23107400  | -1.42769600 |
| H  | 7.46994400  | -3.87954100 | -0.42512500 | H                                            | 2.05275400   | 2.77108700  | -1.55217800 |
| H  | 6.92079200  | -3.43117600 | 1.20066100  | C                                            | 3.61170900   | 4.89687500  | -2.39007200 |
| H  | 6.21864800  | -4.84115000 | 0.38429100  | H                                            | 3.05273600   | 5.41268900  | -0.36259500 |
| C  | 1.30376400  | 0.16678700  | 0.93159500  | H                                            | 4.00473600   | 3.94694400  | -0.48426300 |
| H  | 2.34507800  | 0.40676800  | 0.68168900  | H                                            | 4.53075100   | 5.49151400  | -2.38607200 |
| H  | 1.16824800  | 0.47930300  | 1.97584700  | H                                            | 3.79256600   | 4.00987400  | -3.00810600 |
| C  | 0.40191800  | 1.00056600  | 0.03435400  | H                                            | 2.83430200   | 5.49046000  | -2.88417100 |
| C  | 0.11051300  | 0.60270900  | -1.25810600 | <b>1c</b>                                    |              |             |             |
| H  | -0.39187700 | 1.28825900  | -1.93298800 | Sum of electronic and thermal Free Energies= | -1474.553114 |             |             |
| H  | 0.59340900  | -0.26562100 | -1.69392800 | C                                            | -3.21486600  | -1.71641500 | -1.01541600 |
| C  | -0.86743800 | -3.20800000 | -1.51257900 | C                                            | -3.71576700  | -2.45878900 | -1.97550700 |
| H  | -0.67797700 | -4.28940000 | -1.52263400 | C                                            | -2.73028200  | -0.95962100 | -0.05799900 |
| H  | -1.83008700 | -3.02229300 | -1.99675700 | C                                            | -2.75720700  | 0.55346300  | -0.18362400 |
| H  | -0.07372000 | -2.70614300 | -2.06819000 | H                                            | -1.74252100  | 0.96282500  | -0.06890100 |
| C  | -1.86385000 | -3.51372800 | 0.83339000  | H                                            | -3.10683600  | 0.85860200  | -1.17495300 |
| H  | -2.81391600 | -3.71609500 | 0.33561100  | C                                            | -3.63657200  | 1.24098500  | 0.85005400  |
| H  | -1.38753300 | -4.48128500 | 1.04633800  | O                                            | -4.23974800  | 0.70391700  | 1.75423100  |
| H  | -2.05155000 | -2.99579100 | 1.77260400  | O                                            | -3.66049800  | 2.57661400  | 0.63104500  |
| Pd | -1.60925200 | -0.25677500 | -0.12225800 | C                                            | -4.46056500  | 3.35282600  | 1.55480700  |
| O  | -3.91099500 | 3.16031700  | -0.12686600 | C                                            | -4.38872400  | 4.80377500  | 1.11900700  |
| O  | -3.71790100 | -1.73322800 | -1.61019500 | H                                            | -4.07064800  | 3.20698700  | 2.56721800  |
| C  | -3.32984100 | 2.17650000  | 0.30251400  | H                                            | -5.48547100  | 2.96937200  | 1.53985400  |
| O  | -2.56896200 | 1.46377300  | -0.52450000 | H                                            | -4.99138200  | 5.42228900  | 1.79152300  |
| C  | -4.14343600 | -1.49822900 | -0.47928400 | H                                            | -3.35916300  | 5.17210000  | 1.14516600  |
| O  | -3.41992200 | -1.03785100 | 0.51237400  | H                                            | -4.77291900  | 4.92674700  | 0.10230400  |
| C  | -3.42160300 | 1.75796600  | 1.76018900  | C                                            | -2.13826200  | -1.51958300 | 1.23644400  |
| H  | -2.42549300 | 1.72105600  | 2.21495200  | H                                            | -2.92840300  | -1.54489000 | 1.99319700  |
| H  | -4.03856200 | 2.47785700  | 2.29940400  | H                                            | -1.40017800  | -0.79061900 | 1.59929300  |
| H  | -3.84839300 | 0.75535400  | 1.83231400  | C                                            | -1.47224700  | -2.87441700 | 1.13760800  |
| C  | -5.60358800 | -1.71793100 | -0.10641500 | C                                            | -1.87403000  | -3.91107200 | 1.87972400  |
| H  | -5.69693700 | -2.13283900 | 0.90026200  | H                                            | -1.37201100  | -4.87423200 | 1.83878200  |
| H  | -6.11599200 | -0.74995000 | -0.11451200 | H                                            | -2.72743800  | -3.83361100 | 2.54740200  |
| H  | -6.07892200 | -2.37391000 | -0.83708500 | C                                            | -5.16545100  | -2.90112500 | -1.96019400 |
| C  | 0.14362500  | 2.42128500  | 0.49985600  | H                                            | -5.68780700  | -2.54641600 | -2.85814700 |
| H  | -0.62277200 | 2.87849400  | -0.13100100 | H                                            | -5.23452100  | -3.99658600 | -1.96326200 |
| H  | -0.22197900 | 2.41497700  | 1.53032800  | H                                            | -5.69277500  | -2.52485000 | -1.08136200 |
| C  | 1.42864000  | 3.25728100  | 0.43910700  | C                                            | -2.88948300  | -2.92304600 | -3.15785200 |
| C  | 2.03962900  | 3.59677000  | 1.55000300  | H                                            | -2.85259300  | -4.01927400 | -3.20044200 |
| C  | 2.62141600  | 3.94500700  | 2.66880800  | H                                            | -3.34008200  | -2.58444300 | -4.09971500 |
| H  | 3.40096600  | 3.33675800  | 3.12389500  | H                                            | -1.86539400  | -2.54471700 | -3.11455600 |
| H  | 2.35321900  | 4.86263100  | 3.18907300  | C                                            | -0.30044300  | -3.01083700 | 0.17632400  |

|                                              |              |             |             |    |             |             |             |
|----------------------------------------------|--------------|-------------|-------------|----|-------------|-------------|-------------|
| H                                            | 0.18059100   | -3.98480700 | 0.32590000  | C  | -6.32080700 | 3.35045300  | -0.99243800 |
| H                                            | -0.66903200  | -2.98499500 | -0.85351100 | H  | -5.52278300 | 1.32303300  | -1.00020700 |
| C                                            | 0.74172800   | -1.90599500 | 0.36241500  | H  | -4.72896800 | 2.40790600  | -2.14464800 |
| C                                            | 0.92376400   | -1.05611000 | -0.62263300 | H  | -7.10333400 | 3.14411800  | -1.72922300 |
| C                                            | 0.85191900   | -0.40144200 | -1.82261100 | H  | -6.76229900 | 3.28403900  | 0.00604400  |
| H                                            | 1.42365700   | -0.75597600 | -2.67895200 | H  | -5.96600700 | 4.37372700  | -1.14478500 |
| H                                            | 0.04903600   | 0.30366000  | -2.02241000 | C  | -0.72978800 | 0.14175600  | 1.22349100  |
| C                                            | 1.50532500   | -1.86666300 | 1.67143500  | H  | -1.70466000 | -0.20583600 | 1.58842900  |
| C                                            | 2.74435900   | -2.78558700 | 1.65861200  | H  | -0.01396800 | -0.08698200 | 2.02195500  |
| H                                            | 0.82784000   | -2.17803900 | 2.47613600  | C  | -0.37486500 | -0.76989500 | 0.07000700  |
| H                                            | 1.81925300   | -0.84064000 | 1.89027000  | C  | -0.03616000 | -0.32042300 | -1.18024400 |
| C                                            | 3.47725600   | -2.78857000 | 3.00372300  | H  | -0.00121500 | -1.01094200 | -2.01801400 |
| H                                            | 2.44182300   | -3.80916500 | 1.40302500  | H  | -0.09071900 | 0.73609400  | -1.41453100 |
| H                                            | 3.41832000   | -2.45000400 | 0.86218300  | C  | 2.18925000  | 3.31993500  | -0.41631500 |
| H                                            | 4.35731100   | -3.43892300 | 2.97257000  | H  | 2.33463700  | 4.39738600  | -0.56560300 |
| H                                            | 3.81600500   | -1.78134400 | 3.27156900  | H  | 3.17983800  | 2.85635800  | -0.34496200 |
| H                                            | 2.82775300   | -3.14488200 | 3.81124600  | H  | 1.67782900  | 2.91306400  | -1.29149600 |
| Pd                                           | 2.23601400   | 0.68035300  | -0.57867800 | C  | 2.05931400  | 3.59090000  | 2.13429900  |
| O                                            | 4.01648800   | -0.31876700 | -0.93205700 | H  | 3.01481900  | 3.08087100  | 2.29873000  |
| O                                            | 1.67020000   | 3.23503500  | -1.44611800 | H  | 2.25658600  | 4.66656400  | 2.04556200  |
| C                                            | 4.71209500   | 0.54419300  | -0.26573900 | H  | 1.42135800  | 3.42585100  | 3.00580400  |
| O                                            | 4.10559200   | 1.48460300  | 0.32126200  | Pd | 2.12734800  | -0.59428600 | -0.56999600 |
| C                                            | 0.80798600   | 3.00363200  | -0.60210000 | O  | 3.63218600  | 0.69918300  | 1.60769600  |
| O                                            | 0.67387500   | 1.82772500  | -0.01534500 | O  | 2.59641300  | -0.37203500 | -2.59175600 |
| C                                            | 6.20784300   | 0.42329800  | -0.24066700 | C  | 2.99350200  | -0.23371800 | 2.08069400  |
| H                                            | 6.60391100   | 0.87846000  | 0.66876900  | O  | 2.11399100  | -0.95980800 | 1.41624600  |
| H                                            | 6.50751200   | -0.62403400 | -0.31305300 | C  | 3.84666100  | -0.55674500 | -2.35302000 |
| H                                            | 6.61954400   | 0.95892600  | -1.10295700 | O  | 4.19689000  | -0.79202400 | -1.15583300 |
| C                                            | -0.18293200  | 4.04397700  | -0.11486800 | C  | 3.15153600  | -0.69242300 | 3.52395800  |
| H                                            | -1.19395700  | 3.63256400  | -0.05595500 | H  | 3.64932000  | -1.66726500 | 3.54217100  |
| H                                            | 0.10365700   | 4.36259500  | 0.89303700  | H  | 3.75474600  | 0.03117600  | 4.07367300  |
| H                                            | -0.15964700  | 4.90680700  | -0.78187300 | H  | 2.17678100  | -0.81444100 | 4.00431800  |
| <b>1d</b>                                    |              |             |             | C  | 4.85351300  | -0.45912300 | -3.46061900 |
| Sum of electronic and thermal Free Energies= | -1474.545112 |             |             | H  | 5.23078700  | 0.56813800  | -3.50827200 |
| C                                            | 0.31431600   | 2.36538900  | 0.89516100  | H  | 5.69627000  | -1.12311200 | -3.25864600 |
| C                                            | 1.42774700   | 3.05765300  | 0.86467100  | H  | 4.38925400  | -0.70316700 | -4.41797800 |
| C                                            | -0.78354200  | 1.64589600  | 0.97762300  | C  | -0.51708600 | -2.25390300 | 0.36164100  |
| C                                            | -2.14315000  | 2.32390000  | 0.96218600  | H  | -0.11670000 | -2.82562200 | -0.48450900 |
| H                                            | -2.67369900  | 2.13131100  | 1.90732500  | H  | 0.09331000  | -2.48903500 | 1.23841100  |
| H                                            | -2.02881300  | 3.41007600  | 0.90396000  | C  | -1.96698500 | -2.68025300 | 0.60618400  |
| C                                            | -3.08698000  | 1.89094200  | -0.14874500 | C  | -2.32291400 | -3.14463500 | 1.78098200  |
| O                                            | -2.91691100  | 0.97066400  | -0.92319800 | C  | -2.65900600 | -3.61880800 | 2.95297100  |
| O                                            | -4.18632700  | 2.67172000  | -0.15722500 | H  | -3.03468900 | -2.97487500 | 3.74594000  |
| C                                            | -5.18843100  | 2.35429900  | -1.15281400 | H  | -2.57696000 | -4.67920200 | 3.18428900  |

|                                              |              |             |             |                                              |              |             |             |
|----------------------------------------------|--------------|-------------|-------------|----------------------------------------------|--------------|-------------|-------------|
| C                                            | -2.92066400  | -2.55686900 | -0.57066400 | H                                            | -1.21033600  | 3.10591000  | -0.67035500 |
| C                                            | -4.35304500  | -3.03585300 | -0.31559100 | H                                            | -1.40123400  | 1.51950100  | -1.41008000 |
| H                                            | -2.49019200  | -3.11880200 | -1.41437200 | C                                            | -3.07643500  | 2.13222000  | -0.20000700 |
| H                                            | -2.93813800  | -1.50727300 | -0.89413100 | C                                            | -3.91493100  | 1.37061000  | -0.86223400 |
| C                                            | -5.25086700  | -2.86948500 | -1.54540600 | C                                            | -4.75091600  | 0.60394000  | -1.51719600 |
| H                                            | -4.33859200  | -4.08732900 | -0.00368200 | H                                            | -5.23359200  | 0.93636800  | -2.43459100 |
| H                                            | -4.77422300  | -2.47674300 | 0.52905900  | H                                            | -4.99627700  | -0.39911100 | -1.17115400 |
| H                                            | -6.27176600  | -3.20845500 | -1.34135200 | C                                            | -3.55984300  | 3.08642000  | 0.88223500  |
| H                                            | -5.30201300  | -1.82051900 | -1.85897700 | C                                            | -3.57803800  | 4.56222300  | 0.43920800  |
| H                                            | -4.87304400  | -3.44847400 | -2.39596500 | H                                            | -2.90390900  | 2.98256100  | 1.75711900  |
| <b>1e</b>                                    |              |             |             | H                                            | -4.56646100  | 2.79589700  | 1.20147800  |
| Sum of electronic and thermal Free Energies= | -1474.552800 |             |             | C                                            | -4.03969200  | 5.50284900  | 1.55688700  |
| C                                            | 0.58909500   | -1.06769400 | -0.70700400 | H                                            | -2.57767700  | 4.86121500  | 0.10153100  |
| C                                            | 1.60592000   | -1.66858600 | -1.41542700 | H                                            | -4.23852400  | 4.66301500  | -0.43089200 |
| C                                            | -0.63451400  | -0.94179500 | -0.22693500 | H                                            | -4.05271800  | 6.54461200  | 1.22049800  |
| C                                            | -1.74726100  | -1.76640900 | -0.84849200 | H                                            | -5.05088100  | 5.24959800  | 1.89515800  |
| H                                            | -2.50469800  | -1.10864100 | -1.29098200 | H                                            | -3.37587400  | 5.44173500  | 2.42673800  |
| H                                            | -1.36679800  | -2.39196400 | -1.66397900 | Pd                                           | 2.27306200   | 0.07910500  | -0.14152400 |
| C                                            | -2.43838500  | -2.68852300 | 0.14678200  | O                                            | 2.29913000   | 1.52985000  | -1.64495400 |
| O                                            | -1.98985000  | -3.04211400 | 1.21484500  | O                                            | 4.52138300   | -1.40118500 | 0.89176600  |
| O                                            | -3.63575800  | -3.08750800 | -0.33677200 | C                                            | 3.05792300   | 2.31397600  | -0.95696800 |
| C                                            | -4.37155600  | -4.02111900 | 0.49140500  | O                                            | 3.42979600   | 1.94506700  | 0.19392700  |
| C                                            | -5.67019200  | -4.34089800 | -0.22367900 | C                                            | 3.62752000   | -1.46136300 | 1.73133700  |
| H                                            | -4.54080900  | -3.56415700 | 1.47122000  | O                                            | 2.40478000   | -1.00352200 | 1.54882700  |
| H                                            | -3.75646900  | -4.91307500 | 0.64675600  | C                                            | 3.45263200   | 3.64681000  | -1.52739700 |
| H                                            | -6.25411300  | -5.05165000 | 0.36927700  | H                                            | 4.34204200   | 4.02303600  | -1.01984600 |
| H                                            | -6.27194700  | -3.43868900 | -0.36707300 | H                                            | 3.62960600   | 3.56010700  | -2.60175500 |
| H                                            | -5.47842800  | -4.78673000 | -1.20387300 | H                                            | 2.63268100   | 4.35736700  | -1.37672900 |
| C                                            | -1.00208600  | -0.00354400 | 0.92222100  | C                                            | 3.82635000   | -2.07196700 | 3.10953200  |
| H                                            | -0.42939900  | -0.30351400 | 1.80390200  | H                                            | 3.85145300   | -1.27324200 | 3.85793300  |
| H                                            | -2.05950000  | -0.16209200 | 1.16115300  | H                                            | 2.99491300   | -2.73441800 | 3.36406500  |
| C                                            | -0.77679900  | 1.47041100  | 0.64626300  | H                                            | 4.77035200   | -2.61781600 | 3.13512600  |
| C                                            | 0.06282700   | 2.19471500  | 1.39590000  | <b>2</b>                                     |              |             |             |
| H                                            | 0.21817600   | 3.25473600  | 1.21253700  | Sum of electronic and thermal Free Energies= | -1474.545433 |             |             |
| H                                            | 0.63123500   | 1.75162900  | 2.20829700  | C                                            | 0.80929100   | -1.23098400 | 0.56300600  |
| C                                            | 2.20439600   | -2.97125400 | -0.92359600 | C                                            | 0.77653200   | -2.64163200 | 0.99751900  |
| H                                            | 3.29640800   | -2.92023000 | -0.92002100 | C                                            | 1.84311400   | -0.38496600 | 0.71779700  |
| H                                            | 1.85694100   | -3.21233500 | 0.08044000  | C                                            | 3.15147200   | -0.75945900 | 1.40166700  |
| H                                            | 1.90018000   | -3.77120900 | -1.61193100 | H                                            | 3.49290000   | 0.05694700  | 2.04640700  |
| C                                            | 1.92872600   | -1.28751200 | -2.84532100 | H                                            | 3.01897700   | -1.65930200 | 2.00518800  |
| H                                            | 3.00528700   | -1.34738800 | -3.03132400 | C                                            | 4.22251500   | -1.06151700 | 0.36326500  |
| H                                            | 1.43963600   | -2.01451400 | -3.50872000 | O                                            | 4.34577200   | -2.12184900 | -0.21588000 |
| H                                            | 1.57913000   | -0.28720300 | -3.09695800 | O                                            | 5.00596100   | 0.01136700  | 0.12517600  |
| C                                            | -1.57392400  | 2.08768400  | -0.48984100 | C                                            | 6.02738900   | -0.16230400 | -0.88920300 |

|    |             |             |             |                                               |             |             |             |
|----|-------------|-------------|-------------|-----------------------------------------------|-------------|-------------|-------------|
| C  | 6.76791300  | 1.15424100  | -1.02224600 | C                                             | -1.55321700 | 2.53685500  | 1.17733600  |
| H  | 5.54572600  | -0.46318600 | -1.82462700 | C                                             | -2.11343600 | 3.37672100  | 2.32936800  |
| H  | 6.68824400  | -0.97876800 | -0.58233400 | H                                             | -1.13890000 | 1.59886200  | 1.58192500  |
| H  | 7.55287200  | 1.06195200  | -1.77918500 | H                                             | -2.36136800 | 2.21437500  | 0.50868600  |
| H  | 6.09017700  | 1.95678700  | -1.32731800 | C                                             | -3.16542200 | 2.61984600  | 3.14573500  |
| H  | 7.23512700  | 1.43889500  | -0.07519800 | H                                             | -1.29393500 | 3.69681000  | 2.98456300  |
| C  | 1.72676400  | 1.02399200  | 0.18818400  | H                                             | -2.55072700 | 4.29705800  | 1.92279100  |
| H  | 2.66937700  | 1.35458800  | -0.27472000 | H                                             | -3.56110300 | 3.23980500  | 3.95693500  |
| H  | 1.55397300  | 1.72187200  | 1.01779300  | H                                             | -4.00921900 | 2.31143200  | 2.51841000  |
| C  | 0.60612100  | 1.16211800  | -0.83400100 | H                                             | -2.74246900 | 1.71419300  | 3.59667900  |
| C  | 0.51275900  | 0.24632000  | -1.88817800 | 2'                                            |             |             |             |
| H  | -0.16555800 | 0.45173800  | -2.71525500 | Sum of electronic and thermal Free Energies=- | 1474.543368 |             |             |
| H  | 1.27400900  | -0.51887300 | -2.01021900 | C                                             | -1.14838900 | 0.95079800  | -0.34434000 |
| C  | 1.18372600  | -3.67370500 | -0.02869900 | C                                             | -1.91594800 | 2.18788500  | -0.60538400 |
| H  | 2.24327900  | -3.53343800 | -0.27235200 | C                                             | 0.17758600  | 0.77229800  | -0.43951300 |
| H  | 1.03335900  | -4.69372400 | 0.33698300  | C                                             | 1.10436900  | 1.91378000  | -0.85553300 |
| H  | 0.62010900  | -3.54405400 | -0.95939200 | H                                             | 2.01484500  | 1.51713200  | -1.30923400 |
| C  | 0.37181500  | -2.98909100 | 2.24092200  | H                                             | 0.60998500  | 2.53798100  | -1.60878600 |
| H  | -1.48176200 | -2.56987300 | 1.29146700  | C                                             | 1.51151200  | 2.87844700  | 0.24951800  |
| Pd | -0.84284500 | -0.49904500 | -0.38570700 | O                                             | 0.81370600  | 3.24924700  | 1.17169900  |
| O  | -2.14020500 | 0.97461900  | -3.18795000 | O                                             | 2.75992800  | 3.34338500  | 0.03799000  |
| O  | -3.92196000 | -2.56845200 | -0.55523700 | C                                             | 3.23819700  | 4.32356000  | 0.98783500  |
| C  | -2.94412200 | 0.70800300  | -2.28547100 | C                                             | 4.63640600  | 4.72768600  | 0.56043500  |
| O  | -2.64878500 | 0.28886400  | -1.09084400 | H                                             | 3.22611600  | 3.87846800  | 1.98760600  |
| C  | -3.21747900 | -2.86569400 | 0.36521700  | H                                             | 2.54833700  | 5.17348300  | 0.99848000  |
| O  | -2.09850000 | -2.10864400 | 0.67823700  | H                                             | 5.03768800  | 5.47103400  | 1.25642100  |
| C  | -4.44595300 | 0.87264300  | -2.50458500 | H                                             | 5.30776300  | 3.86412900  | 0.55491800  |
| H  | -4.85755800 | 1.57249600  | -1.77022000 | H                                             | 4.62880200  | 5.16433400  | -0.44250400 |
| H  | -4.64495500 | 1.23618200  | -3.51384100 | C                                             | 0.85246800  | -0.57296300 | -0.24380800 |
| H  | -4.94110600 | -0.08991300 | -2.34555100 | H                                             | 1.39619500  | -0.81506600 | -1.16910900 |
| C  | -3.43023400 | -4.03452800 | 1.30448200  | H                                             | 0.08771400  | -1.35206000 | -0.13443300 |
| H  | -2.54914900 | -4.68467700 | 1.32321300  | C                                             | 1.82265400  | -0.71075000 | 0.91987300  |
| H  | -3.59967300 | -3.67202800 | 2.32364800  | C                                             | 1.80992600  | 0.08379600  | 1.99365700  |
| H  | -4.29712800 | -4.60370600 | 0.97126600  | H                                             | 2.49444400  | -0.08625700 | 2.82084400  |
| H  | 0.35945100  | -4.02853300 | 2.55983600  | H                                             | 1.11487600  | 0.90949600  | 2.09389400  |
| H  | 0.13532200  | -2.23656100 | 2.98924000  | C                                             | -2.44924600 | 2.93617600  | 0.59437500  |
| C  | -0.06314600 | 2.52361700  | -0.96296600 | H                                             | -3.03200200 | 2.27170900  | 1.24139800  |
| H  | 0.67083700  | 3.16760000  | -1.46810800 | H                                             | -1.60184300 | 3.29865100  | 1.18459100  |
| H  | -0.91633900 | 2.42665300  | -1.64199800 | H                                             | -3.07680500 | 3.78056800  | 0.29571600  |
| C  | -0.47883700 | 3.20703300  | 0.33567000  | C                                             | -2.16259800 | 2.59692300  | -1.87186900 |
| C  | 0.07157700  | 4.35236100  | 0.66795300  | H                                             | -3.44112500 | 0.88083700  | -1.87164200 |
| C  | 0.61641500  | 5.50256600  | 0.97189900  | H                                             | -2.73540000 | 3.49841500  | -2.07271700 |
| H  | 0.19476600  | 6.44397400  | 0.62407400  | H                                             | -1.73066700 | 2.08352300  | -2.72793000 |
| H  | 1.51172100  | 5.56860500  | 1.58766000  | Pd                                            | -2.41939400 | -0.52088400 | 0.16638100  |

|                                                          |             |             |             |    |             |             |             |
|----------------------------------------------------------|-------------|-------------|-------------|----|-------------|-------------|-------------|
| O                                                        | -1.61613100 | -1.12946200 | 1.98695200  | C  | 7.50922400  | 0.77144900  | 0.57236800  |
| O                                                        | -5.60348900 | 0.27846800  | -2.50352400 | H  | 6.12767000  | 1.15372400  | -1.06926700 |
| C                                                        | -2.52980500 | -2.01103700 | 2.19723900  | H  | 6.41220500  | -0.55999800 | -0.75919000 |
| O                                                        | -3.44432300 | -2.18805500 | 1.34230700  | H  | 8.40726300  | 0.80709200  | -0.05221700 |
| C                                                        | -4.84145500 | -0.49008900 | -1.97944200 | H  | 7.38038500  | 1.74909100  | 1.04568500  |
| O                                                        | -3.55230300 | -0.07759200 | -1.65862200 | H  | 7.66576400  | 0.02677200  | 1.35801100  |
| C                                                        | -2.49043700 | -2.78866400 | 3.48719600  | C  | 1.03539400  | 1.23037100  | -0.34905800 |
| H                                                        | -3.05979700 | -3.71394700 | 3.38678800  | H  | 1.86996500  | 1.68144600  | -0.90446200 |
| H                                                        | -1.45738400 | -2.99939200 | 3.77170200  | H  | 0.69787600  | 1.99076700  | 0.36741800  |
| H                                                        | -2.94060000 | -2.18377500 | 4.28172900  | C  | -0.09148700 | 0.92502100  | -1.32798700 |
| C                                                        | -5.08205600 | -1.92754800 | -1.62281400 | C  | 0.06157500  | -0.12918400 | -2.22442300 |
| H                                                        | -4.94439300 | -2.08836100 | -0.54903300 | H  | -0.60678000 | -0.22752400 | -3.07673900 |
| H                                                        | -6.09290000 | -2.20051800 | -1.92328200 | H  | 0.99815700  | -0.67609400 | -2.26970100 |
| H                                                        | -4.35354200 | -2.56167100 | -2.13779000 | C  | 0.95704100  | -3.59758300 | 0.30403600  |
| C                                                        | 2.75207600  | -1.90378700 | 0.84035400  | H  | 1.75699100  | -3.50667100 | -0.44020000 |
| H                                                        | 2.16106600  | -2.80233800 | 0.60131200  | H  | 1.14902300  | -4.48055600 | 0.91976300  |
| H                                                        | 3.18674100  | -2.09341600 | 1.83094400  | H  | 0.02019400  | -3.75771900 | -0.24119600 |
| C                                                        | 3.90061300  | -1.83748700 | -0.16636100 | C  | 0.91453000  | -2.39300300 | 2.49555400  |
| C                                                        | 4.26989600  | -0.72827900 | -0.76059600 | Pd | -1.06035100 | -0.94076200 | -0.55810400 |
| C                                                        | 4.65692100  | 0.36716300  | -1.36367500 | O  | -2.37778000 | -2.31361800 | 0.45982800  |
| H                                                        | 5.38804400  | 1.03893000  | -0.91790800 | C  | -3.35597500 | -2.03668000 | -0.32365400 |
| H                                                        | 4.26311800  | 0.65823600  | -2.33614300 | O  | -3.21230400 | -1.18960100 | -1.25488300 |
| C                                                        | 4.62094800  | -3.15850700 | -0.39720500 | C  | -4.67213300 | -2.74525900 | -0.11372400 |
| C                                                        | 5.84809300  | -3.10953800 | -1.31185800 | H  | -5.42697300 | -2.36617200 | -0.80356500 |
| H                                                        | 3.89117900  | -3.87790600 | -0.79992300 | H  | -4.53516900 | -3.81959800 | -0.27178100 |
| H                                                        | 4.91145500  | -3.56358600 | 0.58446200  | H  | -5.00359700 | -2.60873500 | 0.91964500  |
| C                                                        | 6.49999400  | -4.48387000 | -1.49321400 | H  | 1.05784900  | -3.33134400 | 3.02481800  |
| H                                                        | 5.55569600  | -2.70470500 | -2.28808700 | H  | 0.79866700  | -1.49745000 | 3.09787300  |
| H                                                        | 6.57816600  | -2.40276300 | -0.89941300 | C  | -1.11576700 | 2.01866600  | -1.60842500 |
| H                                                        | 7.37438600  | -4.42498400 | -2.14930800 | H  | -0.60782800 | 2.76447800  | -2.23540900 |
| H                                                        | 6.83227900  | -4.89769300 | -0.53406000 | H  | -1.92538700 | 1.59465600  | -2.21590800 |
| H                                                        | 5.80023900  | -5.20172600 | -1.93665400 | C  | -1.71113700 | 2.73422400  | -0.40028300 |
| <b>3</b>                                                 |             |             |             | C  | -1.43321600 | 4.00161100  | -0.19724200 |
| Sum of electronic and thermal Free Energies=-1245.530125 |             |             |             | C  | -1.15844800 | 5.26835100  | -0.02030700 |
| C                                                        | 0.66625700  | -1.07209900 | 0.44787300  | H  | -1.76556700 | 6.05242500  | -0.46923100 |
| C                                                        | 0.86211000  | -2.34925100 | 1.15267600  | H  | -0.31504200 | 5.59273600  | 0.58643300  |
| C                                                        | 1.48529900  | -0.00765200 | 0.39384500  | C  | -2.64268800 | 1.93855800  | 0.49960000  |
| C                                                        | 2.85139300  | 0.04081000  | 1.03674800  | C  | -3.35417900 | 2.73905400  | 1.59470000  |
| H                                                        | 2.96301100  | 0.90823300  | 1.70045300  | H  | -2.06481700 | 1.12323800  | 0.96166600  |
| H                                                        | 3.01787400  | -0.84334300 | 1.65980400  | H  | -3.38178100 | 1.43223200  | -0.13712200 |
| C                                                        | 3.97188900  | 0.09244100  | 0.00518400  | C  | -4.27118800 | 1.86287100  | 2.45383000  |
| O                                                        | 3.84966300  | -0.11449000 | -1.18494100 | H  | -2.60791400 | 3.23106400  | 2.23033000  |
| O                                                        | 5.15026800  | 0.38393700  | 0.59399100  | H  | -3.93638400 | 3.54588300  | 1.13247900  |
| C                                                        | 6.30461900  | 0.41766400  | -0.27874100 | H  | -4.77029000 | 2.45220000  | 3.22988500  |

|   |             |            |            |
|---|-------------|------------|------------|
| H | -5.04881600 | 1.38685900 | 1.84566200 |
| H | -3.70785700 | 1.06525300 | 2.95143500 |

4

Sum of electronic and thermal Free Energies=-1245.518026

|    |             |             |             |
|----|-------------|-------------|-------------|
| C  | -0.53861000 | 0.00154900  | 0.73917200  |
| C  | -0.93294000 | 0.34904500  | 2.12461000  |
| C  | -1.23895200 | -0.75519600 | -0.11857400 |
| C  | -2.59092800 | -1.32866500 | 0.27521000  |
| H  | -2.64737600 | -2.39903400 | 0.03077200  |
| H  | -2.75053100 | -1.25919300 | 1.35389700  |
| C  | -3.77560800 | -0.65395900 | -0.40599500 |
| O  | -3.72578500 | 0.24480300  | -1.21866900 |
| O  | -4.93360400 | -1.19944000 | 0.02809100  |
| C  | -6.14482300 | -0.63918600 | -0.53059900 |
| C  | -7.31737000 | -1.35278100 | 0.11477600  |
| H  | -6.12889000 | -0.77362100 | -1.61691700 |
| H  | -6.15944400 | 0.43732900  | -0.33464300 |
| H  | -8.25739500 | -0.95744300 | -0.28276600 |
| H  | -7.28255500 | -2.42688100 | -0.08850600 |
| H  | -7.31415700 | -1.20770400 | 1.19878100  |
| C  | -0.85238800 | -1.09092400 | -1.55287200 |
| H  | -1.66486800 | -0.71575100 | -2.18620700 |
| H  | -0.87245300 | -2.18634000 | -1.65713600 |
| C  | 0.46419700  | -0.56614700 | -2.09815000 |
| C  | 0.54258000  | 0.65301300  | -2.65681900 |
| H  | 1.47353600  | 1.02941900  | -3.07146700 |
| H  | -0.32144200 | 1.30945600  | -2.70840700 |
| C  | -1.47425000 | 1.74457000  | 2.34946800  |
| H  | -2.39977700 | 1.88458400  | 1.77752100  |
| H  | -1.68591100 | 1.92241400  | 3.40786400  |
| H  | -0.77496800 | 2.50313100  | 1.98552300  |
| C  | -0.82024700 | -0.54070200 | 3.12807100  |
| Pd | 1.13247600  | 0.98461400  | 0.19189900  |
| O  | 0.44529000  | 3.08427100  | -0.04923600 |
| C  | 1.64066600  | 3.45917300  | -0.30038200 |
| O  | 2.59607800  | 2.62156300  | -0.30744500 |
| C  | 1.90310400  | 4.91107300  | -0.62687500 |
| H  | 1.66867500  | 5.08703300  | -1.68259500 |
| H  | 1.25498400  | 5.55622700  | -0.02955100 |
| H  | 2.95269900  | 5.15784100  | -0.45797300 |
| H  | -1.10859800 | -0.28562100 | 4.14454200  |
| H  | -0.44861300 | -1.54732500 | 2.95805600  |
| C  | 1.65906000  | -1.50083100 | -2.08660600 |
| H  | 1.34912400  | -2.48028900 | -2.47914100 |

|   |            |             |             |
|---|------------|-------------|-------------|
| H | 2.42322900 | -1.12830500 | -2.78251400 |
| C | 2.32717700 | -1.72143000 | -0.73701900 |
| C | 2.20524100 | -0.86107300 | 0.25636200  |
| C | 2.38576500 | -0.26423100 | 1.47415600  |
| H | 1.79522200 | -0.55099400 | 2.34048400  |
| H | 3.25696500 | 0.36104200  | 1.66304500  |
| C | 3.20541000 | -2.95986500 | -0.63880200 |
| C | 3.99344900 | -3.14832700 | 0.66014500  |
| H | 3.90428600 | -2.94233600 | -1.48920100 |
| H | 2.56609700 | -3.83961300 | -0.80978700 |
| C | 4.84247000 | -4.42374500 | 0.64793700  |
| H | 4.63905200 | -2.27696500 | 0.82300300  |
| H | 3.29719100 | -3.17728200 | 1.50702300  |
| H | 5.39494500 | -4.54010300 | 1.58551700  |
| H | 4.21973700 | -5.31597100 | 0.51646000  |
| H | 5.57350600 | -4.40769600 | -0.16825300 |

5

Sum of electronic and thermal Free Energies=-1245.564384

|   |             |             |             |
|---|-------------|-------------|-------------|
| C | 0.55576100  | -0.51580200 | 1.44476900  |
| C | 0.26460800  | -1.91425100 | 1.91697000  |
| C | 1.82097300  | -0.08858400 | 1.22212400  |
| C | 3.02110500  | -1.00677000 | 1.35497000  |
| H | 3.80366600  | -0.52793000 | 1.95150500  |
| H | 2.73812000  | -1.94639200 | 1.83066200  |
| C | 3.57581200  | -1.33406100 | -0.02762900 |
| O | 3.04457000  | -2.08390500 | -0.81996500 |
| O | 4.71737700  | -0.66282600 | -0.27893200 |
| C | 5.28013300  | -0.84867500 | -1.60198900 |
| C | 6.57598900  | -0.06332700 | -1.66061700 |
| H | 4.55068300  | -0.49796600 | -2.33861100 |
| H | 5.43602700  | -1.91820200 | -1.77073500 |
| H | 7.03310800  | -0.17645500 | -2.64853200 |
| H | 6.39743700  | 1.00157800  | -1.48536500 |
| H | 7.28636700  | -0.42176900 | -0.91008600 |
| C | 2.14365100  | 1.33077700  | 0.77466900  |
| H | 3.21323400  | 1.52424500  | 0.89094400  |
| H | 1.62271000  | 2.03507300  | 1.43707300  |
| C | 1.72214800  | 1.63128600  | -0.65189300 |
| C | 2.51574800  | 2.26198500  | -1.52250400 |
| H | 2.17944600  | 2.50427300  | -2.52680900 |
| H | 3.52740700  | 2.55818900  | -1.25907300 |
| C | -0.05683900 | -2.93193400 | 0.84821500  |
| H | 0.77155100  | -2.99987400 | 0.13320500  |
| H | -0.23898700 | -3.91864800 | 1.28320500  |



|                                                          |             |             |             |    |             |             |             |
|----------------------------------------------------------|-------------|-------------|-------------|----|-------------|-------------|-------------|
| H                                                        | -0.94843500 | -2.63569800 | 0.28131700  | H  | -5.62048800 | -1.70854700 | 1.99183700  |
| C                                                        | 0.31057300  | -2.22048200 | 3.21983800  | H  | -7.24209700 | 0.10699500  | 2.64789100  |
| Pd                                                       | -2.26745400 | -0.20716400 | 0.00100600  | H  | -6.63501200 | 1.13239300  | 1.33461400  |
| O                                                        | -2.95650700 | -0.60991300 | -2.05315300 | H  | -7.50205400 | -0.36905000 | 0.95910900  |
| C                                                        | -3.88013400 | -1.35396000 | -1.58893500 | C  | -2.38473600 | 1.22141400  | -0.96899300 |
| O                                                        | -4.00514200 | -1.51359800 | -0.33099900 | H  | -3.45893300 | 1.38874200  | -1.08284900 |
| C                                                        | -4.84190400 | -2.04489000 | -2.52588600 | H  | -1.88595900 | 1.84653800  | -1.72196200 |
| H                                                        | -5.84214500 | -1.61996800 | -2.39376300 | C  | -1.93313000 | 1.68943400  | 0.40304400  |
| H                                                        | -4.52822800 | -1.91978300 | -3.56288600 | C  | -2.71468800 | 2.41013200  | 1.21243600  |
| H                                                        | -4.90264800 | -3.10725900 | -2.27448700 | H  | -2.35950000 | 2.77038700  | 2.17390000  |
| H                                                        | 0.10054900  | -3.22769300 | 3.57022800  | H  | -3.73529100 | 2.66421100  | 0.93949300  |
| H                                                        | 0.55984700  | -1.47918900 | 3.97387000  | C  | -0.15778000 | -2.97122000 | -0.50724300 |
| C                                                        | 0.33376700  | 1.13111800  | -1.01220900 | H  | -1.00661800 | -2.97448400 | 0.18693600  |
| H                                                        | -0.02667000 | 1.62737600  | -1.91765700 | H  | 0.07585100  | -4.00008100 | -0.79518300 |
| H                                                        | 0.42490600  | 0.06504000  | -1.25269500 | H  | 0.69916100  | -2.56297200 | 0.04325800  |
| C                                                        | -0.70209100 | 1.28486500  | 0.09849500  | C  | -0.52247500 | -2.61418400 | -2.95896300 |
| C                                                        | -0.59967500 | 0.41777900  | 1.25006900  | Pd | 2.16663800  | -0.18104300 | -0.19325000 |
| C                                                        | -1.78655600 | 0.27385400  | 2.02405800  | O  | 2.33185200  | 0.08652100  | 1.89087600  |
| H                                                        | -2.43852900 | 1.12010000  | 2.21406400  | C  | 3.31977500  | -0.51062700 | 2.47959700  |
| H                                                        | -1.83521200 | -0.52576400 | 2.75507900  | O  | 4.17359300  | -1.22353600 | 1.93089000  |
| C                                                        | -1.43163100 | 2.62567700  | 0.13172200  | C  | 3.37418600  | -0.27534000 | 3.98570000  |
| C                                                        | -0.55827900 | 3.82004300  | 0.58109800  | H  | 3.42533700  | 0.79821800  | 4.19015300  |
| H                                                        | -2.31128800 | 2.58417800  | 0.78020500  | H  | 2.45584400  | -0.65055000 | 4.44760300  |
| H                                                        | -1.81134400 | 2.82647400  | -0.87775900 | H  | 4.23832400  | -0.77858900 | 4.42004000  |
| C                                                        | -1.32972000 | 5.14269500  | 0.53017900  | H  | -0.30147100 | -3.65919100 | -3.15989400 |
| H                                                        | -0.20620500 | 3.63910400  | 1.60501900  | H  | -0.78240000 | -1.99310900 | -3.81151300 |
| H                                                        | 0.33373400  | 3.88929200  | -0.05075900 | C  | -0.53287600 | 1.24178700  | 0.78352600  |
| H                                                        | -0.70464100 | 5.97813800  | 0.86136000  | H  | -0.14964500 | 1.83506400  | 1.61715200  |
| H                                                        | -1.66884800 | 5.36374000  | -0.48805800 | H  | -0.60584800 | 0.21002600  | 1.14645900  |
| H                                                        | -2.21572500 | 5.11323000  | 1.17454900  | C  | 0.46793700  | 1.27501800  | -0.36581200 |
| <b>6</b>                                                 |             |             |             | C  | 0.35477200  | 0.29774100  | -1.40602500 |
| Sum of electronic and thermal Free Energies=-1358.888770 |             |             |             | C  | 1.50340700  | 0.07672600  | -2.22926600 |
| C                                                        | -0.78582000 | -0.67513300 | -1.44056700 | H  | 2.11844600  | 0.90999300  | -2.55461700 |
| C                                                        | -0.48089000 | -2.12203200 | -1.71429900 | H  | 1.49961200  | -0.77867200 | -2.89491900 |
| C                                                        | -2.05239300 | -0.23795300 | -1.24777300 | C  | 1.23182100  | 2.58613300  | -0.53089500 |
| C                                                        | -3.24227600 | -1.17857500 | -1.24598800 | C  | 0.36281200  | 3.75375600  | -1.05549500 |
| H                                                        | -4.03475200 | -0.78864700 | -1.89208100 | H  | 2.08959600  | 2.47419100  | -1.20002400 |
| H                                                        | -2.95365300 | -2.16936900 | -1.59898300 | H  | 1.64373200  | 2.86274500  | 0.44684600  |
| C                                                        | -3.78298700 | -1.32961900 | 0.17228500  | C  | 1.15609600  | 5.06155300  | -1.14068000 |
| O                                                        | -3.23565900 | -1.96354500 | 1.05035200  | H  | -0.02464700 | 3.49253700  | -2.04881500 |
| O                                                        | -4.93209100 | -0.64718900 | 0.34341800  | H  | -0.50746200 | 3.88975800  | -0.40467500 |
| C                                                        | -5.48440500 | -0.66772500 | 1.68414400  | H  | 0.53384200  | 5.87707100  | -1.52272400 |
| C                                                        | -6.79340000 | 0.09692900  | 1.64980800  | H  | 1.53133400  | 5.36152400  | -0.15593800 |
| H                                                        | -4.75660000 | -0.21202800 | 2.36273300  | H  | 2.02009300  | 4.96066200  | -1.80731000 |

|   |            |             |             |
|---|------------|-------------|-------------|
| C | 3.75976600 | -1.35642700 | -0.39934000 |
| O | 4.61100800 | -2.03206500 | -0.75581600 |

7

Sum of electronic and thermal Free Energies=-1474.577497

|    |             |             |             |
|----|-------------|-------------|-------------|
| C  | -1.14763500 | -0.88177400 | -1.18059400 |
| C  | -0.72588000 | -2.32373800 | -1.13098200 |
| C  | -2.45305200 | -0.52447400 | -1.14214700 |
| C  | -3.57085100 | -1.53741200 | -0.97919500 |
| H  | -4.35020400 | -1.37199700 | -1.72963900 |
| H  | -3.18756300 | -2.55308900 | -1.08647700 |
| C  | -4.18464200 | -1.41590900 | 0.41045100  |
| O  | -3.64124300 | -1.76648000 | 1.43761800  |
| O  | -5.40397800 | -0.83966700 | 0.36920400  |
| C  | -6.03872600 | -0.61392800 | 1.65121100  |
| C  | -7.40460500 | -0.01137700 | 1.38366100  |
| H  | -5.40129300 | 0.05318300  | 2.24000300  |
| H  | -6.10464300 | -1.56680500 | 2.18488600  |
| H  | -7.91955200 | 0.17602900  | 2.33107300  |
| H  | -7.31607200 | 0.93799800  | 0.84751700  |
| H  | -8.02111000 | -0.68836200 | 0.78526400  |
| C  | -2.90431800 | 0.92830900  | -1.20225100 |
| H  | -3.97702800 | 0.98319700  | -1.40759300 |
| H  | -2.39279700 | 1.41885600  | -2.04195300 |
| C  | -2.57729000 | 1.71232800  | 0.05554400  |
| C  | -3.44200800 | 2.54676900  | 0.63975600  |
| H  | -3.16795000 | 3.13054800  | 1.51432800  |
| H  | -4.45236000 | 2.67594300  | 0.26129100  |
| C  | -0.36661900 | -2.86354200 | 0.23309900  |
| H  | -1.22233900 | -2.76782300 | 0.91238200  |
| H  | -0.06455000 | -3.91314300 | 0.17779500  |
| H  | 0.46191700  | -2.29184200 | 0.67029000  |
| C  | -0.70018900 | -3.07566200 | -2.23807300 |
| Pd | 1.90203100  | -0.12257100 | -0.17723500 |
| H  | -0.38867700 | -4.11629200 | -2.20636400 |
| H  | -0.98004000 | -2.67439000 | -3.20791700 |
| C  | -1.18165100 | 1.44457000  | 0.59302400  |
| H  | -0.89757400 | 2.22347200  | 1.30669700  |
| H  | -1.22716200 | 0.50022500  | 1.14996700  |
| C  | -0.11741600 | 1.31758600  | -0.48920200 |
| C  | -0.08292000 | 0.17086000  | -1.29531900 |
| C  | 1.10671200  | -0.11022200 | -2.08974300 |
| H  | 1.58546500  | 0.70482600  | -2.62769900 |
| H  | 1.14364200  | -1.05861800 | -2.61493400 |
| C  | 0.66098900  | 2.58945600  | -0.78955300 |

|   |             |             |             |
|---|-------------|-------------|-------------|
| C | -0.15062700 | 3.62253300  | -1.60727100 |
| H | 1.59232300  | 2.37945800  | -1.32300300 |
| H | 0.95531700  | 3.05234700  | 0.16170200  |
| C | 0.62809200  | 4.92154200  | -1.83637900 |
| H | -0.41817900 | 3.17603600  | -2.57358400 |
| H | -1.09413600 | 3.84139700  | -1.09395800 |
| H | 0.04358300  | 5.63568000  | -2.42546000 |
| H | 0.88265800  | 5.40415000  | -0.88584900 |
| H | 1.56507300  | 4.73442200  | -2.37317800 |
| C | 5.98334700  | -1.26751500 | -0.34943500 |
| H | 5.95577500  | -2.29946700 | 0.00964300  |
| H | 6.17779500  | -1.27282200 | -1.42378000 |
| H | 6.75480900  | -0.70063600 | 0.17381400  |
| C | 3.56910300  | -1.17143200 | -0.67177800 |
| O | 3.72067700  | -2.14561900 | -1.36517200 |
| O | 2.17795800  | 0.22294900  | 2.02393400  |
| C | 3.16262000  | 0.40767800  | 2.74537900  |
| O | 4.41156100  | 0.31269300  | 2.34852400  |
| O | 4.73568100  | -0.59369300 | -0.07579300 |
| H | 4.47781100  | 0.01025000  | 1.38724500  |
| C | 3.01918700  | 0.76789200  | 4.20168300  |
| H | 3.46627800  | -0.01882200 | 4.81696100  |
| H | 3.56555100  | 1.69244600  | 4.40903900  |
| H | 1.96684400  | 0.88521700  | 4.45649300  |

**r-p1**

Sum of electronic and thermal Free Energies=-1474.587257

|   |             |             |             |
|---|-------------|-------------|-------------|
| C | -0.93203900 | -0.19862100 | -0.71228800 |
| C | -0.09962500 | -1.42687600 | -0.42092900 |
| C | -2.19300700 | -0.28518600 | -1.19373300 |
| C | -2.86056100 | -1.58716700 | -1.59828800 |
| H | -3.09846700 | -1.56822700 | -2.66733300 |
| H | -2.20479200 | -2.43893900 | -1.40733400 |
| C | -4.18656800 | -1.79383300 | -0.88005500 |
| O | -5.28014200 | -1.69105500 | -1.39392100 |
| O | -4.00177400 | -2.08609700 | 0.42712400  |
| C | -5.20654700 | -2.21960600 | 1.21822900  |
| C | -4.79232800 | -2.61193200 | 2.62339700  |
| H | -5.85271100 | -2.97044200 | 0.75366300  |
| H | -5.73912600 | -1.26347000 | 1.19796400  |
| H | -5.68001700 | -2.71906700 | 3.25478500  |
| H | -4.25478300 | -3.56467800 | 2.62246200  |
| H | -4.14473700 | -1.85101300 | 3.06846200  |
| C | -3.07036900 | 0.95520500  | -1.30235500 |
| H | -3.95400400 | 0.75356000  | -1.91444700 |

|    |             |             |             |                                               |             |             |             |
|----|-------------|-------------|-------------|-----------------------------------------------|-------------|-------------|-------------|
| H  | -2.50224500 | 1.74971000  | -1.80388500 | H                                             | 6.27588300  | -2.78713600 | 1.22012000  |
| C  | -3.49489700 | 1.48173200  | 0.06073900  | H                                             | 6.95316000  | -1.23676800 | 1.81253000  |
| C  | -4.74181200 | 1.88726300  | 0.32041800  | <b>ts1</b>                                    |             |             |             |
| H  | -5.01519900 | 2.30521900  | 1.28593700  | Sum of electronic and thermal Free Energies=- | 1474.518479 |             |             |
| H  | -5.53058300 | 1.81460300  | -0.42300300 | C                                             | -0.81070200 | -1.64548900 | 0.55309000  |
| C  | -0.41577900 | -2.04753400 | 0.93819000  | C                                             | -1.88375200 | -2.57479400 | 0.52144000  |
| H  | -1.46929000 | -2.35261500 | 0.98199300  | C                                             | 0.47368000  | -1.73511900 | 0.91650800  |
| H  | 0.21099100  | -2.92257200 | 1.13479800  | C                                             | 1.07804900  | -3.00791300 | 1.49911400  |
| H  | -0.25439600 | -1.32434500 | 1.74443900  | H                                             | 1.79646700  | -2.76227200 | 2.28744500  |
| C  | 0.50302900  | -2.19630200 | -1.42933000 | H                                             | 0.29525600  | -3.64196700 | 1.92096400  |
| Pd | 2.04327700  | -1.11373800 | -0.37384200 | C                                             | 1.77699100  | -3.81407700 | 0.41241400  |
| H  | 0.71688600  | -3.25129000 | -1.26677800 | O                                             | 1.21523200  | -4.57822900 | -0.34651200 |
| H  | 0.44659000  | -1.88222700 | -2.46824400 | O                                             | 3.09599200  | -3.54777200 | 0.36544900  |
| C  | -2.38927400 | 1.49647500  | 1.10856600  | C                                             | 3.84819100  | -4.23265800 | -0.67000600 |
| H  | -2.68583500 | 2.13091400  | 1.94949500  | C                                             | 5.29518700  | -3.79810500 | -0.54485500 |
| H  | -2.29978800 | 0.47391100  | 1.49792700  | H                                             | 3.41965900  | -3.97337200 | -1.64287100 |
| C  | -1.03840400 | 1.93249200  | 0.55347200  | H                                             | 3.72651600  | -5.31112600 | -0.53200900 |
| C  | -0.38108600 | 1.13960500  | -0.32277000 | H                                             | 5.89826100  | -4.29733800 | -1.30932700 |
| C  | 0.83328200  | 1.60744700  | -1.10251200 | H                                             | 5.39319900  | -2.71731700 | -0.68279000 |
| H  | 0.86633300  | 2.70399500  | -1.12502300 | H                                             | 5.69957300  | -4.05922700 | 0.43710300  |
| H  | 0.73524500  | 1.29289400  | -2.14555500 | C                                             | 1.39129100  | -0.54207500 | 0.78549200  |
| C  | -0.54924600 | 3.29344100  | 1.00005700  | H                                             | 2.37262900  | -0.85071600 | 0.39957700  |
| C  | -1.29781100 | 4.47010200  | 0.33853400  | H                                             | 1.58849500  | -0.12548700 | 1.78311600  |
| H  | 0.52651800  | 3.39789800  | 0.82926600  | C                                             | 0.83474600  | 0.55242600  | -0.11774300 |
| H  | -0.68271400 | 3.36484100  | 2.08890400  | C                                             | 0.35033000  | 0.24255300  | -1.38119600 |
| C  | -0.84808900 | 5.83289600  | 0.87400600  | H                                             | 0.14427100  | 1.03761000  | -2.09114500 |
| H  | -1.13993200 | 4.42742800  | -0.74720000 | H                                             | 0.41340800  | -0.76848400 | -1.77073400 |
| H  | -2.37733800 | 4.34922200  | 0.49048100  | C                                             | -2.01989600 | -3.47446700 | -0.67145400 |
| H  | -1.38379400 | 6.65134500  | 0.38220100  | H                                             | -1.85651400 | -2.92470500 | -1.60292100 |
| H  | -1.03129400 | 5.91478200  | 1.95152100  | H                                             | -1.21634700 | -4.22272200 | -0.61155300 |
| H  | 0.22417900  | 5.99005600  | 0.70987200  | H                                             | -2.99126700 | -3.97123000 | -0.70561300 |
| C  | 4.49370200  | 1.39353400  | -1.40913500 | C                                             | -2.92800100 | -2.48745200 | 1.48259500  |
| H  | 4.87886200  | 0.38060000  | -1.26954500 | H                                             | -3.42215500 | -1.46290000 | 1.01806200  |
| H  | 4.95253400  | 1.84437000  | -2.28978200 | H                                             | -3.68212100 | -3.27149900 | 1.46571600  |
| H  | 4.70391000  | 1.99857300  | -0.52345200 | H                                             | -2.63980600 | -2.14002400 | 2.47689000  |
| O  | 3.08747100  | 1.36086100  | -1.68396300 | Pd                                            | -1.44762600 | 0.24082800  | -0.13331200 |
| C  | 2.22359200  | 1.18769100  | -0.64586900 | O                                             | -2.50078200 | 4.24160400  | -0.53008300 |
| O  | 2.60162300  | 1.17678100  | 0.55084500  | O                                             | -5.43764000 | -0.91895500 | -0.25912000 |
| H  | 3.89586700  | 0.48049200  | 1.26520100  | C                                             | -2.24875200 | 3.14912600  | -0.04319900 |
| O  | 4.28374000  | -1.58175100 | 0.19077300  | O                                             | -1.78324400 | 2.16012100  | -0.78994000 |
| C  | 4.91721700  | -1.13433500 | 1.14870200  | C                                             | -4.57659800 | -0.06424700 | -0.36611300 |
| O  | 4.66787500  | 0.02996500  | 1.72259900  | O                                             | -3.46327100 | -0.13077500 | 0.39672600  |
| C  | 6.06691400  | -1.87669000 | 1.78031200  | C                                             | -2.44725500 | 2.87863600  | 1.44576200  |
| H  | 5.81126200  | -2.12808800 | 2.81451300  | H                                             | -1.50979700 | 2.54601500  | 1.90646700  |

|                                                          |             |             |             |    |             |             |             |
|----------------------------------------------------------|-------------|-------------|-------------|----|-------------|-------------|-------------|
| H                                                        | -2.78766900 | 3.78990700  | 1.93948700  | H  | 0.04736900  | -1.29186000 | 0.01209400  |
| H                                                        | -3.17927100 | 2.07933200  | 1.59281700  | C  | 1.81383500  | -0.57643700 | 0.96847900  |
| C                                                        | -4.70260200 | 1.12444300  | -1.29323500 | C  | 1.83143900  | 0.32102600  | 1.95804000  |
| H                                                        | -5.56780600 | 0.97430500  | -1.93945800 | H  | 2.53276900  | 0.22959900  | 2.78313200  |
| H                                                        | -4.84881600 | 2.03684200  | -0.70612800 | H  | 1.13869800  | 1.15461800  | 1.99424600  |
| H                                                        | -3.79692400 | 1.28287500  | -1.88130500 | C  | -2.47969300 | 3.01179700  | 0.43538200  |
| C                                                        | 1.18139400  | 1.98055800  | 0.23686900  | H  | -2.60677800 | 2.47029700  | 1.37484700  |
| H                                                        | 0.98649300  | 2.15589800  | 1.30364400  | H  | -1.67721500 | 3.74230000  | 0.60166900  |
| H                                                        | 0.53223800  | 2.66361900  | -0.32041400 | H  | -3.40194900 | 3.53548100  | 0.17159800  |
| C                                                        | 2.64007400  | 2.35637200  | -0.04008100 | C  | -2.54017600 | 2.22700800  | -1.97277000 |
| C                                                        | 3.45310900  | 1.59144600  | -0.72779500 | H  | -3.26739500 | 1.16897000  | -1.87581500 |
| C                                                        | 4.26962600  | 0.82989000  | -1.41149100 | H  | -3.15859800 | 3.09551200  | -2.19193300 |
| H                                                        | 4.34760400  | 0.90116200  | -2.49483200 | H  | -1.91450600 | 1.87819300  | -2.79621200 |
| H                                                        | 4.91679100  | 0.10218600  | -0.92358000 | Pd | -2.51732200 | -0.41515500 | 0.27877500  |
| C                                                        | 3.05343400  | 3.71391200  | 0.50940200  | O  | -1.70385400 | -0.84795600 | 2.14846900  |
| C                                                        | 4.47271300  | 4.17174600  | 0.16164200  | O  | -4.78814300 | -0.52651900 | -3.27085100 |
| H                                                        | 2.93106500  | 3.69109400  | 1.60310200  | C  | -2.59857600 | -1.73555900 | 2.40277100  |
| H                                                        | 2.32704900  | 4.45872300  | 0.15194300  | O  | -3.48206800 | -1.98792600 | 1.52939300  |
| C                                                        | 4.80499400  | 5.54553600  | 0.75245600  | C  | -4.27823000 | -0.92294600 | -2.24385200 |
| H                                                        | 5.19293300  | 3.42743200  | 0.52235700  | O  | -3.57208200 | -0.07959500 | -1.46135500 |
| H                                                        | 4.58568000  | 4.19935100  | -0.92869700 | C  | -2.59238800 | -2.42590200 | 3.73895300  |
| H                                                        | 5.82198400  | 5.85317800  | 0.48933300  | H  | -3.05943700 | -3.40883200 | 3.65621600  |
| H                                                        | 4.11879000  | 6.31525500  | 0.38171700  | H  | -1.57179700 | -2.51228600 | 4.11673600  |
| H                                                        | 4.73311200  | 5.53809300  | 1.84613300  | H  | -3.17055800 | -1.82748700 | 4.45145600  |
| <b>ts1'</b>                                              |             |             |             | C  | -4.35581000 | -2.34897800 | -1.74336700 |
| Sum of electronic and thermal Free Energies=-1474.526557 |             |             |             | H  | -4.67778200 | -2.38764900 | -0.69955700 |
| C                                                        | -1.15916300 | 0.99799800  | -0.35484800 | H  | -5.04490700 | -2.90872400 | -2.37630100 |
| C                                                        | -2.00908200 | 2.11027400  | -0.66822300 | H  | -3.36420100 | -2.81190300 | -1.79127500 |
| C                                                        | 0.15624200  | 0.79348600  | -0.47113100 | C  | 2.73398400  | -1.77874300 | 0.98349000  |
| C                                                        | 1.07509400  | 1.89924800  | -0.99187700 | H  | 2.12967200  | -2.69216100 | 0.86466500  |
| H                                                        | 1.99479800  | 1.46880200  | -1.39156000 | H  | 3.20449100  | -1.86464800 | 1.97202200  |
| H                                                        | 0.57791700  | 2.43454900  | -1.81126800 | C  | 3.84318400  | -1.83060700 | -0.06717300 |
| C                                                        | 1.44859100  | 2.97225000  | 0.02219300  | C  | 4.18477000  | -0.79983300 | -0.80247900 |
| O                                                        | 0.67911800  | 3.51241300  | 0.79296900  | C  | 4.54587800  | 0.21361400  | -1.54841700 |
| O                                                        | 2.74867200  | 3.30177000  | -0.07630100 | H  | 5.29171600  | 0.93292100  | -1.21559700 |
| C                                                        | 3.20930200  | 4.34673100  | 0.81386100  | H  | 4.11610700  | 0.38323700  | -2.53449100 |
| C                                                        | 4.68684400  | 4.55542500  | 0.54299100  | C  | 4.56003200  | -3.16991800 | -0.16915700 |
| H                                                        | 3.01919400  | 4.03532700  | 1.84549700  | C  | 5.73924800  | -3.23355800 | -1.14386500 |
| H                                                        | 2.62289900  | 5.25241300  | 0.62926300  | H  | 3.81574100  | -3.93334800 | -0.44347300 |
| H                                                        | 5.07785900  | 5.33774100  | 1.20094500  | H  | 4.90182600  | -3.45098600 | 0.83897500  |
| H                                                        | 5.25029800  | 3.63647100  | 0.72810400  | C  | 6.39368600  | -4.61808600 | -1.18326400 |
| H                                                        | 4.85615200  | 4.86148700  | -0.49340800 | H  | 5.39443200  | -2.95685800 | -2.14732800 |
| C                                                        | 0.81971000  | -0.53733300 | -0.18241100 | H  | 6.48295900  | -2.47861200 | -0.86186900 |
| H                                                        | 1.34099000  | -0.86423200 | -1.09372900 | H  | 7.23212400  | -4.64047900 | -1.88676500 |

|                                                          |             |             |             |                                                          |             |             |             |
|----------------------------------------------------------|-------------|-------------|-------------|----------------------------------------------------------|-------------|-------------|-------------|
| H                                                        | 6.77952500  | -4.90545000 | -0.19834700 | C                                                        | 3.52386700  | -3.92389100 | -1.34439000 |
| H                                                        | 5.67892300  | -5.38852500 | -1.49474300 | H                                                        | 2.67943000  | -4.61531600 | -1.25418400 |
| <b>ts2</b>                                               |             |             |             | H                                                        | 3.59653200  | -3.61950800 | -2.39362900 |
| Sum of electronic and thermal Free Energies=-1474.543306 |             |             |             | H                                                        | 4.44211500  | -4.42853200 | -1.04678800 |
| C                                                        | -0.78062300 | -1.22719100 | -0.59439500 | H                                                        | -0.25725800 | -3.98274900 | -2.63270300 |
| C                                                        | -0.71941200 | -2.62823800 | -1.05468200 | H                                                        | -0.06208300 | -2.18050200 | -3.03208700 |
| C                                                        | -1.83377100 | -0.39989500 | -0.71790900 | C                                                        | 0.02962700  | 2.49993200  | 1.02766300  |
| C                                                        | -3.13687100 | -0.78263200 | -1.40736100 | H                                                        | -0.69395300 | 3.11201900  | 1.58404100  |
| H                                                        | -3.49362300 | 0.04165900  | -2.03361400 | H                                                        | 0.91366300  | 2.39345700  | 1.66336800  |
| H                                                        | -2.98835900 | -1.66583200 | -2.03155000 | C                                                        | 0.39230200  | 3.23913200  | -0.25563100 |
| C                                                        | -4.20223800 | -1.12734200 | -0.37664900 | C                                                        | -0.20476600 | 4.37479000  | -0.53670400 |
| O                                                        | -4.30667400 | -2.20245600 | 0.17844100  | C                                                        | -0.79610300 | 5.51422800  | -0.78981100 |
| O                                                        | -5.00534200 | -0.07452500 | -0.11507200 | H                                                        | -0.39814800 | 6.45836500  | -0.42206700 |
| C                                                        | -6.02386200 | -0.28981300 | 0.89416500  | H                                                        | -1.70817900 | 5.56827900  | -1.38162300 |
| C                                                        | -6.79181300 | 1.00810500  | 1.05239500  | C                                                        | 1.47100800  | 2.63365400  | -1.13992000 |
| H                                                        | -5.53694200 | -0.59922500 | 1.82408800  | C                                                        | 1.96574700  | 3.52485300  | -2.28292600 |
| H                                                        | -6.66728300 | -1.11357300 | 0.57022700  | H                                                        | 1.08502300  | 1.68974600  | -1.55855500 |
| H                                                        | -7.57570700 | 0.88442300  | 1.80596700  | H                                                        | 2.30714800  | 2.32891200  | -0.49760500 |
| H                                                        | -6.13134800 | 1.81835200  | 1.37454300  | C                                                        | 3.02692300  | 2.83395000  | -3.14497200 |
| H                                                        | -7.26366400 | 1.30184700  | 0.11042600  | H                                                        | 1.11705500  | 3.82617400  | -2.90936300 |
| C                                                        | -1.74597000 | 0.99645500  | -0.14786700 | H                                                        | 2.37479000  | 4.45257200  | -1.86388300 |
| H                                                        | -2.69277400 | 1.28960900  | 0.33135000  | H                                                        | 3.37446200  | 3.48982000  | -3.94999800 |
| H                                                        | -1.59724100 | 1.72229300  | -0.95775400 | H                                                        | 3.89937200  | 2.54673700  | -2.54750600 |
| C                                                        | -0.61806800 | 1.13035500  | 0.86841800  | H                                                        | 2.63066300  | 1.92231400  | -3.60789000 |
| C                                                        | -0.50079800 | 0.18814800  | 1.89579500  | <b>ts3</b>                                               |             |             |             |
| H                                                        | 0.18799900  | 0.35212600  | 2.72401900  | Sum of electronic and thermal Free Energies=-1245.514911 |             |             |             |
| H                                                        | -1.24544300 | -0.59640200 | 1.99627600  | C                                                        | 0.68257900  | -0.31590100 | 0.80406200  |
| C                                                        | -1.11862400 | -3.68425900 | -0.04943000 | C                                                        | 1.03411000  | -1.11267700 | 1.99744800  |
| H                                                        | -2.18248900 | -3.56657600 | 0.18730300  | C                                                        | 1.44039300  | 0.60411700  | 0.18848600  |
| H                                                        | -0.94702900 | -4.69540200 | -0.43017800 | C                                                        | 2.83170000  | 0.96902400  | 0.65740400  |
| H                                                        | -0.56600300 | -3.56009700 | 0.88866500  | H                                                        | 2.94156700  | 2.05520100  | 0.78314400  |
| C                                                        | -0.29267000 | -2.94882000 | -2.29810000 | H                                                        | 3.04102400  | 0.53026100  | 1.63748300  |
| H                                                        | 1.53733100  | -2.51294900 | -1.32830400 | C                                                        | 3.92419300  | 0.50760300  | -0.29925400 |
| Pd                                                       | 0.85948500  | -0.47334900 | 0.35843900  | O                                                        | 3.76518700  | -0.18257400 | -1.28474800 |
| O                                                        | 2.20293300  | 0.39985800  | 3.30241900  | O                                                        | 5.12877700  | 0.96677500  | 0.10250700  |
| O                                                        | 4.06761200  | -2.33384200 | 0.39486000  | C                                                        | 6.26051700  | 0.57310500  | -0.70875700 |
| C                                                        | 2.95396000  | 0.52516200  | 2.32907600  | C                                                        | 7.50279800  | 1.17614600  | -0.08103600 |
| O                                                        | 2.61252600  | 0.42044200  | 1.07612800  | H                                                        | 6.10200100  | 0.92845800  | -1.73196500 |
| C                                                        | 3.32057100  | -2.71122700 | -0.46060300 | H                                                        | 6.30620900  | -0.51987300 | -0.74489900 |
| O                                                        | 2.15312300  | -2.01792200 | -0.73967100 | H                                                        | 8.38555700  | 0.90153800  | -0.66687200 |
| C                                                        | 4.43664700  | 0.83387000  | 2.51821700  | H                                                        | 7.43595600  | 2.26753700  | -0.05071800 |
| H                                                        | 4.72094500  | 1.71133700  | 1.92928000  | H                                                        | 7.64100200  | 0.81154100  | 0.94087200  |
| H                                                        | 4.65758900  | 1.00366600  | 3.57307100  | C                                                        | 0.93836900  | 1.34319700  | -1.03331800 |
| H                                                        | 5.02327900  | -0.01135500 | 2.14535000  | H                                                        | 1.74462300  | 1.41182700  | -1.77464400 |

|                                                          |             |             |             |   |             |             |             |
|----------------------------------------------------------|-------------|-------------|-------------|---|-------------|-------------|-------------|
| H                                                        | 0.69340100  | 2.37657900  | -0.74976500 | H | 0.90661300  | -3.57713900 | 0.91272600  |
| C                                                        | -0.27569300 | 0.69353500  | -1.69124500 | H | 1.11840700  | -3.12535600 | -0.79308600 |
| C                                                        | -0.17799100 | -0.55395800 | -2.24207000 | C | 2.71954100  | -2.56229200 | 0.52732200  |
| H                                                        | -0.99500300 | -0.98506100 | -2.81184600 | O | 3.32048200  | -3.04393200 | 1.46379700  |
| H                                                        | 0.76672400  | -1.08913000 | -2.22895700 | O | 3.26625000  | -1.72569000 | -0.37743600 |
| C                                                        | 1.42748100  | -2.55562700 | 1.76685200  | C | 4.62597200  | -1.28554300 | -0.13518500 |
| H                                                        | 2.29014800  | -2.60833200 | 1.09136700  | C | 4.80177200  | 0.05475700  | -0.82483200 |
| H                                                        | 1.68964600  | -3.04699200 | 2.70837400  | H | 5.30826100  | -2.04808100 | -0.52740300 |
| H                                                        | 0.61316500  | -3.10923800 | 1.29055400  | H | 4.78198800  | -1.21990300 | 0.94421600  |
| C                                                        | 1.00842300  | -0.56491200 | 3.22646300  | H | 5.81349200  | 0.43258700  | -0.64357600 |
| Pd                                                       | -1.07417200 | -0.86647500 | -0.00973800 | H | 4.66188300  | -0.03743600 | -1.90636300 |
| O                                                        | -1.31046500 | -3.20884900 | 0.04091100  | H | 4.07699600  | 0.77767500  | -0.43884700 |
| C                                                        | -2.43141100 | -3.05062100 | -0.52262500 | C | 0.53187900  | -0.97527600 | 1.89949900  |
| O                                                        | -2.87038200 | -1.88504800 | -0.81485700 | H | 1.36712100  | -0.26702200 | 1.97119300  |
| C                                                        | -3.27616400 | -4.25303000 | -0.88987000 | H | 0.78802600  | -1.82017800 | 2.55521800  |
| H                                                        | -4.31732600 | -4.08163800 | -0.60395600 | C | -0.72910100 | -0.33065000 | 2.43098000  |
| H                                                        | -3.25330400 | -4.39199200 | -1.97608900 | C | -0.70081000 | 0.75046600  | 3.21574000  |
| H                                                        | -2.89415600 | -5.15390000 | -0.40747100 | H | -1.60822000 | 1.17041900  | 3.64185500  |
| H                                                        | 1.27513600  | -1.14282600 | 4.10753100  | H | 0.23066000  | 1.25746400  | 3.44810000  |
| H                                                        | 0.72758800  | 0.47260700  | 3.38357500  | C | 0.84126700  | -0.83501800 | -2.87187800 |
| C                                                        | -1.49835500 | 1.57872800  | -1.86138100 | H | 1.83514000  | -1.05279200 | -2.46692600 |
| H                                                        | -1.19242600 | 2.52084800  | -2.33939100 | H | 0.75282900  | -1.27786600 | -3.86826500 |
| H                                                        | -2.22086900 | 1.10494900  | -2.53830500 | H | 0.77523800  | 0.25554500  | -2.96724100 |
| C                                                        | -2.19561400 | 1.88654300  | -0.53827200 | C | -1.15702900 | -2.24076500 | -2.34243200 |
| C                                                        | -2.10940900 | 1.02090900  | 0.45583700  | H | -1.17457000 | -2.61638600 | -3.36214200 |
| C                                                        | -2.29719200 | 0.29003600  | 1.58345600  | H | -1.92092500 | -2.61100200 | -1.66596200 |
| H                                                        | -1.67773300 | 0.42946200  | 2.46466900  | C | -2.03075700 | -1.01622900 | 2.05528300  |
| H                                                        | -3.17739500 | -0.33993800 | 1.68935000  | H | -1.84858600 | -2.09203300 | 1.89683500  |
| C                                                        | -3.02652900 | 3.15565900  | -0.47564400 | H | -2.74791500 | -0.94480800 | 2.88123300  |
| C                                                        | -3.81621700 | 3.38651500  | 0.81593700  | C | -2.69800200 | -0.46504100 | 0.81106200  |
| H                                                        | -3.71958400 | 3.14428900  | -1.33089400 | C | -2.00674200 | 0.04509700  | -0.21406500 |
| H                                                        | -2.35831700 | 4.01162900  | -0.65730200 | C | -2.07728700 | 0.97652900  | -1.26314300 |
| C                                                        | -4.61944300 | 4.69063200  | 0.78590400  | H | -1.91887600 | 0.66517900  | -2.29296500 |
| H                                                        | -4.49190600 | 2.53915900  | 0.98267300  | H | -2.66027200 | 1.88403000  | -1.12466600 |
| H                                                        | -3.12383900 | 3.39739900  | 1.66658200  | C | -4.21136500 | -0.60774800 | 0.78292500  |
| H                                                        | -5.17449400 | 4.83457400  | 1.71819200  | C | -4.93747200 | -0.35437500 | -0.54216200 |
| H                                                        | -3.96495500 | 5.55954200  | 0.65159100  | H | -4.62459300 | 0.05509000  | 1.55977600  |
| H                                                        | -5.34472300 | 4.69279200  | -0.03568600 | H | -4.44692700 | -1.62670600 | 1.12757600  |
| <b>ts4</b>                                               |             |             |             | C | -6.43902600 | -0.64330000 | -0.44049600 |
| Sum of electronic and thermal Free Energies=-1245.496043 |             |             |             | H | -4.78828900 | 0.68415900  | -0.85638200 |
| C                                                        | -0.19170700 | -0.86945500 | -0.53233300 | H | -4.49066700 | -0.97890600 | -1.32527200 |
| C                                                        | -0.22733200 | -1.36132200 | -1.93973900 | H | -6.94274500 | -0.45639600 | -1.39395700 |
| C                                                        | 0.44251000  | -1.50617900 | 0.47803600  | H | -6.62599800 | -1.68742400 | -0.16457600 |
| C                                                        | 1.23797500  | -2.78268700 | 0.23642600  | H | -6.91640500 | -0.01097000 | 0.31671400  |

|                                                          |             |             |             |                                                          |             |             |             |
|----------------------------------------------------------|-------------|-------------|-------------|----------------------------------------------------------|-------------|-------------|-------------|
| Pd                                                       | -0.20157800 | 1.22566000  | -0.37302000 | H                                                        | -2.00564700 | -3.22427100 | -3.54132500 |
| O                                                        | 0.40168500  | 3.32950800  | -0.40772200 | H                                                        | -2.80561900 | -4.26717700 | -2.31850000 |
| C                                                        | 1.51821800  | 3.05411500  | 0.14453200  | H                                                        | 0.11701500  | -2.48970900 | 4.09837300  |
| O                                                        | 1.81506800  | 1.85204700  | 0.43649300  | H                                                        | 0.49942200  | -0.67884400 | 4.18016400  |
| C                                                        | 2.50229300  | 4.16691800  | 0.41952400  | C                                                        | 0.45598500  | 1.08741300  | -1.15967800 |
| H                                                        | 1.97444200  | 5.10085200  | 0.62175500  | H                                                        | 0.11810900  | 1.46896100  | -2.12710500 |
| H                                                        | 3.15243600  | 3.90325800  | 1.25581400  | H                                                        | 0.54141600  | -0.00013000 | -1.26762100 |
| H                                                        | 3.12739300  | 4.31631200  | -0.46787700 | C                                                        | -0.60302500 | 1.37812100  | -0.10083100 |
| <b>ts5</b>                                               |             |             |             | C                                                        | -0.53744300 | 0.64816100  | 1.14785300  |
| Sum of electronic and thermal Free Energies=-1358.870244 |             |             |             | C                                                        | -1.76648800 | 0.60091200  | 1.87361000  |
| C                                                        | 0.62362500  | -0.21275000 | 1.52671700  | H                                                        | -2.40522800 | 1.47480700  | 1.94049400  |
| C                                                        | 0.34092200  | -1.51213600 | 2.23312600  | H                                                        | -1.85341600 | -0.10147900 | 2.69605900  |
| C                                                        | 1.89105600  | 0.19743800  | 1.28046800  | C                                                        | -1.33980500 | 2.70373700  | -0.25689200 |
| C                                                        | 3.09621700  | -0.66154400 | 1.61335800  | C                                                        | -0.47734300 | 3.95269800  | 0.04042600  |
| H                                                        | 3.83726200  | -0.07686300 | 2.16734900  | H                                                        | -2.22712300 | 2.74388100  | 0.37989100  |
| H                                                        | 2.80307800  | -1.52193700 | 2.21579000  | H                                                        | -1.70358200 | 2.76622800  | -1.28992700 |
| C                                                        | 3.73433400  | -1.18784800 | 0.33203200  | C                                                        | -1.25263400 | 5.25128100  | -0.20431300 |
| O                                                        | 3.27145800  | -2.07617700 | -0.35186400 | H                                                        | -0.14386000 | 3.91583900  | 1.08552400  |
| O                                                        | 4.86922500  | -0.52344000 | 0.03198200  | H                                                        | 0.42566200  | 3.93993400  | -0.57920300 |
| C                                                        | 5.51586900  | -0.90843200 | -1.20697800 | H                                                        | -0.63560000 | 6.12725600  | 0.01945600  |
| C                                                        | 6.79536800  | -0.10271000 | -1.32260900 | H                                                        | -1.57497600 | 5.32887500  | -1.24865100 |
| H                                                        | 4.82624300  | -0.70989500 | -2.03331900 | H                                                        | -2.14894600 | 5.30569100  | 0.42399300  |
| H                                                        | 5.70557700  | -1.98555000 | -1.18426800 | C                                                        | -4.37827300 | 0.19384800  | -0.06915700 |
| H                                                        | 7.31513200  | -0.36363500 | -2.24971300 | O                                                        | -5.30750800 | 0.24079900  | 0.59207200  |
| H                                                        | 6.58329400  | 0.97034600  | -1.33885100 | <b>ts6</b>                                               |             |             |             |
| H                                                        | 7.46556100  | -0.30879800 | -0.48310500 | Sum of electronic and thermal Free Energies=-1474.572415 |             |             |             |
| C                                                        | 2.21577600  | 1.53770400  | 0.63420800  | C                                                        | -1.15075200 | -0.91696400 | -1.29073000 |
| H                                                        | 3.27989900  | 1.75810800  | 0.75245200  | C                                                        | -0.80118200 | -2.37963500 | -1.29422600 |
| H                                                        | 1.67027800  | 2.32448500  | 1.17338100  | C                                                        | -2.43174700 | -0.49270900 | -1.18027600 |
| C                                                        | 1.83714500  | 1.62835900  | -0.83154300 | C                                                        | -3.59227400 | -1.45247500 | -0.99899600 |
| C                                                        | 2.66105000  | 2.11990700  | -1.76147000 | H                                                        | -4.39321600 | -1.21898400 | -1.70728100 |
| H                                                        | 2.35698800  | 2.21282500  | -2.80036200 | H                                                        | -3.26952700 | -2.48219700 | -1.15785100 |
| H                                                        | 3.66815100  | 2.44379400  | -1.51377800 | C                                                        | -4.13760200 | -1.35035700 | 0.42137400  |
| C                                                        | 0.11024300  | -2.72827300 | 1.36754100  | O                                                        | -3.57484100 | -1.78183400 | 1.40602300  |
| H                                                        | 0.95570600  | -2.86956600 | 0.68386900  | O                                                        | -5.31535800 | -0.69512100 | 0.45818000  |
| H                                                        | -0.00505000 | -3.62633000 | 1.98150000  | C                                                        | -5.88046100 | -0.48652300 | 1.77645500  |
| H                                                        | -0.79222400 | -2.61980200 | 0.75393900  | C                                                        | -7.21403100 | 0.21245700  | 1.59531900  |
| C                                                        | 0.31775600  | -1.56041200 | 3.57164300  | H                                                        | -5.17670900 | 0.11204000  | 2.36312300  |
| Pd                                                       | -2.11099900 | -0.20115200 | -0.09144100 | H                                                        | -5.98540500 | -1.45639800 | 2.27160400  |
| O                                                        | -1.96655000 | -1.12829300 | -2.05746100 | H                                                        | -7.67399200 | 0.39142300  | 2.57213300  |
| C                                                        | -2.54116300 | -2.21965800 | -1.71063200 | H                                                        | -7.08656500 | 1.17656600  | 1.09446100  |
| O                                                        | -2.93433200 | -2.41112000 | -0.52436500 | H                                                        | -7.89897700 | -0.39755100 | 0.99938900  |
| C                                                        | -2.77798800 | -3.27408900 | -2.77107500 | C                                                        | -2.80875400 | 0.98237500  | -1.17686400 |
| H                                                        | -3.74704200 | -3.08856600 | -3.24796600 | H                                                        | -3.88581700 | 1.09625900  | -1.32597900 |

|    |             |             |             |                                               |             |             |             |
|----|-------------|-------------|-------------|-----------------------------------------------|-------------|-------------|-------------|
| H  | -2.31708100 | 1.47276000  | -2.02816700 | O                                             | 4.79992500  | -0.34584400 | 0.15883400  |
| C  | -2.38165400 | 1.70794000  | 0.08630200  | H                                             | 4.42600100  | 0.05824600  | 1.17383300  |
| C  | -3.18403100 | 2.54774700  | 0.74662500  | <b>ts7</b>                                    |             |             |             |
| H  | -2.84247000 | 3.08903100  | 1.62460900  | Sum of electronic and thermal Free Energies=- | 1474.546173 |             |             |
| H  | -4.20870500 | 2.72240300  | 0.43021900  | C                                             | -0.97726100 | -0.24299800 | -0.81088400 |
| C  | -0.43743400 | -2.97832200 | 0.04391800  | C                                             | -0.21928100 | -1.53077800 | -0.59316900 |
| H  | -1.27158700 | -2.86309700 | 0.74636900  | C                                             | -2.25068300 | -0.21731300 | -1.26335800 |
| H  | -0.18846100 | -4.03910400 | -0.04965900 | C                                             | -3.03416400 | -1.45546800 | -1.65291200 |
| H  | 0.42473500  | -2.45954900 | 0.48155600  | H                                             | -3.36250000 | -1.38566800 | -2.69510100 |
| C  | -0.83810400 | -3.09617000 | -2.42470600 | H                                             | -2.42216800 | -2.35344000 | -1.54233300 |
| Pd | 1.82578600  | -0.18942200 | -0.22643500 | C                                             | -4.30138000 | -1.61188400 | -0.82263500 |
| H  | -0.58319800 | -4.15266800 | -2.43131700 | O                                             | -5.43104600 | -1.48365600 | -1.24256900 |
| H  | -1.12293600 | -2.65239000 | -3.37448400 | O                                             | -4.01175300 | -1.90163400 | 0.46686600  |
| C  | -0.97117200 | 1.37539500  | 0.54042000  | C                                             | -5.14841600 | -2.00155300 | 1.35786400  |
| H  | -0.61252100 | 2.12467600  | 1.25110600  | C                                             | -4.62745500 | -2.40039600 | 2.72515200  |
| H  | -1.01525200 | 0.42408000  | 1.08416300  | H                                             | -5.85050700 | -2.73690100 | 0.95356600  |
| C  | 0.02992700  | 1.22807600  | -0.59774600 | H                                             | -5.65687800 | -1.03239300 | 1.37754200  |
| C  | -0.04031200 | 0.08155600  | -1.43238800 | H                                             | -5.46093200 | -2.48010500 | 3.43012300  |
| C  | 1.12406200  | -0.24841000 | -2.21680300 | H                                             | -4.11915200 | -3.36828200 | 2.68454500  |
| H  | 1.68154500  | 0.53612800  | -2.72017100 | H                                             | -3.92360400 | -1.65658700 | 3.10983300  |
| H  | 1.13696800  | -1.20635500 | -2.72494000 | C                                             | -3.01704700 | 1.09508200  | -1.34086900 |
| C  | 0.78775900  | 2.49631300  | -0.97094800 | H                                             | -3.92203400 | 0.97908500  | -1.94438900 |
| C  | -0.07683500 | 3.53131500  | -1.72948000 | H                                             | -2.38314000 | 1.83960300  | -1.84092800 |
| H  | 1.67236800  | 2.27894900  | -1.57605200 | C                                             | -3.37609500 | 1.64804800  | 0.03010600  |
| H  | 1.15990600  | 2.95761700  | -0.04791600 | C                                             | -4.56827600 | 2.18773900  | 0.30099100  |
| C  | 0.69795000  | 4.81848700  | -2.02857200 | H                                             | -4.78770100 | 2.62301600  | 1.27246900  |
| H  | -0.42432400 | 3.08259000  | -2.66903900 | H                                             | -5.36407600 | 2.21371100  | -0.43805300 |
| H  | -0.97327100 | 3.76651300  | -1.14472900 | C                                             | -0.29069400 | -2.06111400 | 0.82824100  |
| H  | 0.07640200  | 5.53660500  | -2.57302600 | H                                             | -1.32286300 | -2.36224800 | 1.04912500  |
| H  | 1.03401800  | 5.30212400  | -1.10453900 | H                                             | 0.36754000  | -2.92292200 | 0.96910500  |
| H  | 1.58618500  | 4.61668600  | -2.63794800 | H                                             | -0.01762900 | -1.28696200 | 1.55212600  |
| C  | 6.07189800  | -0.98167000 | 0.27023000  | C                                             | 0.28769700  | -2.29476400 | -1.61174700 |
| H  | 6.03571000  | -1.94186700 | -0.25511100 | Pd                                            | 1.97003400  | -0.75189000 | -0.79336500 |
| H  | 6.84016900  | -0.35045800 | -0.18758500 | H                                             | 0.67626400  | -3.29131200 | -1.42225000 |
| H  | 6.32130200  | -1.15573600 | 1.32280600  | H                                             | 0.18099900  | -1.99345900 | -2.64916600 |
| C  | 3.48953300  | -1.32402700 | -0.47424300 | C                                             | -2.27186000 | 1.52311200  | 1.06964000  |
| O  | 3.88833800  | -2.33341400 | -0.91640500 | H                                             | -2.50555300 | 2.15614500  | 1.93108700  |
| O  | 1.89915900  | 0.26489600  | 1.89955400  | H                                             | -2.28810900 | 0.48341800  | 1.42513400  |
| C  | 2.88515000  | 0.47656100  | 2.65806400  | C                                             | -0.87681700 | 1.83657800  | 0.54227100  |
| O  | 4.11487200  | 0.43695100  | 2.33038000  | C                                             | -0.29051200 | 1.01817600  | -0.36942000 |
| C  | 2.59637400  | 0.80579400  | 4.11151800  | C                                             | 1.02494300  | 1.31556300  | -1.02945700 |
| H  | 1.52667300  | 0.93209600  | 4.27871900  | H                                             | 1.26652900  | 2.37520400  | -0.96350500 |
| H  | 2.97153800  | -0.00579000 | 4.74304700  | H                                             | 1.02112600  | 1.08337700  | -2.10026000 |
| H  | 3.13575600  | 1.71319200  | 4.39666300  | C                                             | -0.24175900 | 3.10557900  | 1.06821000  |



|                                                          |             |             |             |    |             |             |             |
|----------------------------------------------------------|-------------|-------------|-------------|----|-------------|-------------|-------------|
| C                                                        | -0.81136100 | 4.38840100  | 0.42423900  | H  | -1.95301600 | 1.90828000  | -1.65683700 |
| H                                                        | 0.84535600  | 3.08157600  | 0.94875200  | C  | -1.97009900 | 1.65926300  | 0.46001600  |
| H                                                        | -0.41586000 | 3.15538700  | 2.15242800  | C  | -2.77016400 | 2.31259100  | 1.30804900  |
| C                                                        | -0.22678800 | 5.66635100  | 1.03361400  | H  | -2.41792200 | 2.64409100  | 2.28091100  |
| H                                                        | -0.60902600 | 4.36475000  | -0.65451600 | H  | -3.80287100 | 2.53871300  | 1.05661900  |
| H                                                        | -1.90367000 | 4.39457600  | 0.52621700  | C  | -0.07513000 | -2.90720800 | -0.68246900 |
| H                                                        | -0.63868700 | 6.56117400  | 0.55557700  | H  | -0.92081700 | -2.97011800 | 0.01255000  |
| H                                                        | -0.44634300 | 5.73012400  | 2.10552900  | H  | 0.18816800  | -3.91361400 | -1.02056200 |
| H                                                        | 0.86279300  | 5.69856700  | 0.91899700  | H  | 0.76881600  | -2.49584800 | -0.11435600 |
| C                                                        | 4.72041000  | 2.28014700  | -0.57741200 | C  | -0.45649600 | -2.44073400 | -3.11280000 |
| H                                                        | 5.34808400  | 1.61311300  | 0.01990200  | Pd | 2.09407800  | -0.01509800 | -0.19108200 |
| H                                                        | 5.28335700  | 2.66287700  | -1.42895200 | O  | 2.27397000  | 0.14776800  | 1.94016300  |
| H                                                        | 4.37902500  | 3.10279400  | 0.05705100  | C  | 3.13335700  | -0.49637200 | 2.63693800  |
| O                                                        | 3.60248500  | 1.57052600  | -1.13974000 | O  | 4.02785100  | -1.25862900 | 2.19129000  |
| C                                                        | 2.72517300  | 1.03410500  | -0.23936400 | C  | 3.04835300  | -0.27802100 | 4.14080200  |
| O                                                        | 2.88938200  | 1.18986600  | 0.98062200  | H  | 3.38871000  | 0.73607700  | 4.37589600  |
| H                                                        | 3.57817800  | -0.27315700 | 1.58646300  | H  | 2.01117400  | -0.36048800 | 4.47585500  |
| O                                                        | 3.60562300  | -2.15932600 | 0.06383500  | H  | 3.67664700  | -0.99675100 | 4.66820700  |
| C                                                        | 4.18581500  | -2.06375500 | 1.14531700  | H  | -0.20762700 | -3.46833700 | -3.36512500 |
| O                                                        | 4.12321600  | -1.02103100 | 1.95717700  | H  | -0.73482100 | -1.78592800 | -3.93365600 |
| C                                                        | 5.06672200  | -3.16413400 | 1.68265100  | C  | -0.54983100 | 1.25205600  | 0.80974200  |
| H                                                        | 4.71238000  | -3.47201000 | 2.67076100  | H  | -0.18145600 | 1.82607300  | 1.66353600  |
| H                                                        | 5.06102400  | -4.01233800 | 0.99942400  | H  | -0.57799300 | 0.20508900  | 1.13319200  |
| H                                                        | 6.08747500  | -2.79007600 | 1.80653300  | C  | 0.44223900  | 1.36711000  | -0.34386000 |
| <b>8</b>                                                 |             |             |             | C  | 0.34416600  | 0.41056300  | -1.42439300 |
| Sum of electronic and thermal Free Energies=-1361.263510 |             |             |             | C  | 1.50440200  | 0.26615300  | -2.23587600 |
| C                                                        | -0.77120800 | -0.58687700 | -1.49996000 | H  | 2.10167000  | 1.12761100  | -2.51678900 |
| C                                                        | -0.42702900 | -2.00951900 | -1.84535200 | H  | 1.55847000  | -0.57868800 | -2.91385200 |
| C                                                        | -2.04798700 | -0.19862800 | -1.27411000 | C  | 1.09906200  | 2.73638700  | -0.50678100 |
| C                                                        | -3.20845200 | -1.17543000 | -1.30261000 | C  | 0.15314500  | 3.84663100  | -1.01976400 |
| H                                                        | -4.02276500 | -0.77978200 | -1.91731500 | H  | 1.96148900  | 2.68741000  | -1.17761800 |
| H                                                        | -2.89455300 | -2.13773700 | -1.70916500 | H  | 1.49502500  | 3.03338000  | 0.47194300  |
| C                                                        | -3.72267500 | -1.41513600 | 0.11311500  | C  | 0.85289900  | 5.20792700  | -1.08654900 |
| O                                                        | -3.14190000 | -2.07279000 | 0.95155000  | H  | -0.21156000 | 3.57286000  | -2.01845200 |
| O                                                        | -4.89209800 | -0.78302300 | 0.33356800  | H  | -0.72676200 | 3.91631500  | -0.37120400 |
| C                                                        | -5.42272500 | -0.88988300 | 1.67872700  | H  | 0.17637200  | 5.98281500  | -1.46117400 |
| C                                                        | -6.76459000 | -0.18394200 | 1.69733500  | H  | 1.20280900  | 5.52144200  | -0.09664000 |
| H                                                        | -4.70565900 | -0.43352500 | 2.36824000  | H  | 1.72428800  | 5.17667900  | -1.75048300 |
| H                                                        | -5.50816900 | -1.94870800 | 1.93978100  | H  | 4.06710100  | -1.28533300 | 0.71482900  |
| H                                                        | -7.19785800 | -0.23939200 | 2.70079200  | C  | 3.95619600  | -2.48115500 | -0.92228700 |
| H                                                        | -6.65719900 | 0.87081400  | 1.42803700  | H  | 3.68733400  | -2.36870600 | -1.97574300 |
| H                                                        | -7.46246700 | -0.64959800 | 0.99550700  | H  | 4.96628800  | -2.90489500 | -0.86236700 |
| C                                                        | -2.42159500 | 1.23559600  | -0.92626300 | H  | 3.25242100  | -3.17946700 | -0.45076500 |
| H                                                        | -3.50191300 | 1.37358000  | -1.02115500 | O  | 3.92918000  | -1.19808000 | -0.30816700 |

|          |                                                          |             |             |                                                          |             |             |             |
|----------|----------------------------------------------------------|-------------|-------------|----------------------------------------------------------|-------------|-------------|-------------|
| <b>9</b> |                                                          |             |             | H                                                        | 1.66159500  | 2.95549700  | -0.91855100 |
|          | Sum of electronic and thermal Free Energies=-1361.220925 |             |             | H                                                        | 1.05095200  | 3.25578400  | 0.68975900  |
| C        | -0.69876500                                              | -0.58079700 | -1.42953300 | C                                                        | 0.27761800  | 5.32729100  | -0.94680800 |
| C        | -0.20157600                                              | -1.95599900 | -1.77797000 | H                                                        | -0.54339600 | 3.57521200  | -1.90962500 |
| C        | -2.01723300                                              | -0.31799300 | -1.27855600 | H                                                        | -1.19375200 | 3.88125600  | -0.30322600 |
| C        | -3.07778000                                              | -1.39825400 | -1.37852800 | H                                                        | -0.45363100 | 6.01973600  | -1.37647600 |
| H        | -3.89409500                                              | -1.07224100 | -2.03041200 | H                                                        | 0.52981000  | 5.68965300  | 0.05621000  |
| H        | -2.65329400                                              | -2.32013600 | -1.77831700 | H                                                        | 1.18725800  | 5.38278200  | -1.55584000 |
| C        | -3.63746800                                              | -1.70804100 | 0.00543900  | O                                                        | 3.91327000  | -1.01878300 | -0.28290500 |
| O        | -3.03997800                                              | -2.31890600 | 0.86741700  | C                                                        | 2.02151600  | 1.13405800  | 2.97767800  |
| O        | -4.87314800                                              | -1.19531700 | 0.17168100  | H                                                        | 2.66192600  | 1.15585300  | 3.87780800  |
| C        | -5.45755100                                              | -1.37339800 | 1.48577900  | H                                                        | 1.88684000  | 2.19116800  | 2.67440700  |
| C        | -6.85010100                                              | -0.77402300 | 1.45005800  | H                                                        | 1.02995600  | 0.76942700  | 3.31113700  |
| H        | -4.81367600                                              | -0.87906500 | 2.21975100  | C                                                        | 4.47367200  | -1.76656400 | 0.51436300  |
| H        | -5.47261600                                              | -2.44144700 | 1.72244600  | O                                                        | 5.75360500  | -2.11648400 | 0.31604700  |
| H        | -7.32728700                                              | -0.88657300 | 2.42855300  | H                                                        | 6.04770100  | -1.65499800 | -0.48867100 |
| H        | -6.81148100                                              | 0.29194400  | 1.20770300  | C                                                        | 3.85348900  | -2.36715700 | 1.73395600  |
| H        | -7.47365000                                              | -1.27482000 | 0.70380000  | H                                                        | 3.33559500  | -1.54788200 | 2.25305400  |
| C        | -2.54007800                                              | 1.07275100  | -0.94437600 | H                                                        | 3.10164000  | -3.09866000 | 1.41862300  |
| H        | -3.62036700                                              | 1.11642600  | -1.10790100 | H                                                        | 4.59866400  | -2.85798600 | 2.35954900  |
| H        | -2.08786800                                              | 1.79229600  | -1.63936300 | <b>10</b>                                                |             |             |             |
| C        | -2.21630600                                              | 1.51855500  | 0.46972400  | Sum of electronic and thermal Free Energies=-1245.504062 |             |             |             |
| C        | -3.12595800                                              | 2.08425100  | 1.26920900  | C                                                        | -0.38503300 | -0.77764500 | -1.14883700 |
| H        | -2.86895100                                              | 2.43315500  | 2.26570200  | C                                                        | -0.08035800 | -2.24581300 | -1.25917100 |
| H        | -4.15688300                                              | 2.21903700  | 0.95291000  | C                                                        | -1.65144400 | -0.30553300 | -1.21472600 |
| C        | 0.20046200                                               | -2.83189600 | -0.61560000 | C                                                        | -2.85703900 | -1.22006500 | -1.30435100 |
| H        | -0.65929500                                              | -2.99837400 | 0.04429100  | H                                                        | -3.52969100 | -0.89654800 | -2.10434600 |
| H        | 0.58453800                                               | -3.79761400 | -0.95753500 | H                                                        | -2.54844700 | -2.24841200 | -1.49951300 |
| H        | 0.97168200                                               | -2.33663300 | -0.01274100 | C                                                        | -3.61123800 | -1.20487900 | 0.02151900  |
| C        | -0.14209600                                              | -2.36713400 | -3.05108000 | O                                                        | -3.18013700 | -1.66147200 | 1.06032600  |
| Pd       | 2.01262800                                               | 0.24841900  | 0.05146700  | O                                                        | -4.80851900 | -0.59721700 | -0.09022300 |
| O        | 2.60718400                                               | 0.33925700  | 2.00109000  | C                                                        | -5.57318500 | -0.48008400 | 1.13595400  |
| H        | 0.21954100                                               | -3.35964800 | -3.30786600 | C                                                        | -6.89484800 | 0.17713200  | 0.78840200  |
| H        | -0.45468300                                              | -1.72928200 | -3.87287400 | H                                                        | -4.99140100 | 0.11210200  | 1.84925100  |
| C        | -0.79093800                                              | 1.23687700  | 0.91041200  | H                                                        | -5.70671400 | -1.47802600 | 1.56380400  |
| H        | -0.54683700                                              | 1.83165100  | 1.79419600  | H                                                        | -7.50233900 | 0.28697500  | 1.69205500  |
| H        | -0.74926300                                              | 0.18617400  | 1.21976700  | H                                                        | -6.73800600 | 1.17019700  | 0.35746900  |
| C        | 0.27165200                                               | 1.46196800  | -0.16413900 | H                                                        | -7.45551000 | -0.42625600 | 0.06872600  |
| C        | 0.31474600                                               | 0.51479800  | -1.27578400 | C                                                        | -1.97612000 | 1.18072000  | -1.14262200 |
| C        | 1.48650600                                               | 0.52250900  | -2.06267700 | H                                                        | -3.00815400 | 1.35541600  | -1.45934500 |
| H        | 2.02787600                                               | 1.44031400  | -2.26516400 | H                                                        | -1.33500700 | 1.71474600  | -1.85662600 |
| H        | 1.65697500                                               | -0.29088500 | -2.75933000 | C                                                        | -1.75136600 | 1.78642600  | 0.23137400  |
| C        | 0.75555300                                               | 2.90573500  | -0.30749800 | C                                                        | -2.61005000 | 2.63971600  | 0.79687600  |
| C        | -0.27267700                                              | 3.89804200  | -0.89572100 | H                                                        | -2.40771600 | 3.09466100  | 1.76262400  |

|                                                          |             |             |             |    |             |             |             |
|----------------------------------------------------------|-------------|-------------|-------------|----|-------------|-------------|-------------|
| H                                                        | -3.54355600 | 2.91338400  | 0.31281700  | O  | -4.61729200 | -0.22175800 | 0.56647600  |
| C                                                        | 0.06598100  | -3.00227000 | 0.04005000  | C  | -5.03288100 | -0.30801300 | 1.95291200  |
| H                                                        | -0.84895900 | -2.90462700 | 0.63639500  | C  | -6.18041200 | 0.66417300  | 2.14595500  |
| H                                                        | 0.26860800  | -4.06180900 | -0.13861800 | H  | -4.17410400 | -0.06435000 | 2.58577600  |
| H                                                        | 0.88868500  | -2.59293200 | 0.63939900  | H  | -5.32391500 | -1.34029500 | 2.16883700  |
| C                                                        | 0.03040700  | -2.83388500 | -2.45718900 | H  | -6.52437300 | 0.62897900  | 3.18431200  |
| Pd                                                       | 2.38155500  | -0.27870800 | 0.47839300  | H  | -5.86742100 | 1.68826500  | 1.92298300  |
| H                                                        | 0.25172500  | -3.89419500 | -2.54681400 | H  | -7.02296600 | 0.41129800  | 1.49582500  |
| H                                                        | -0.09532300 | -2.27714100 | -3.38149600 | C  | -1.96166200 | 1.41273400  | -0.84644300 |
| C                                                        | -0.47689100 | 1.31713200  | 0.91066300  | H  | -3.00295100 | 1.74530400  | -0.86741500 |
| H                                                        | -0.24316400 | 1.96597600  | 1.76021700  | H  | -1.42513600 | 2.02221900  | -1.58508200 |
| H                                                        | -0.67990600 | 0.31786900  | 1.31321800  | C  | -1.36332900 | 1.69120400  | 0.52298300  |
| C                                                        | 0.72817500  | 1.23187100  | -0.02298100 | C  | -1.96371300 | 2.48233500  | 1.41760300  |
| C                                                        | 0.76108600  | 0.17958700  | -0.99585000 | H  | -1.50382000 | 2.70368200  | 2.37656600  |
| C                                                        | 2.00729400  | -0.09832400 | -1.63214800 | H  | -2.93145400 | 2.93607000  | 1.21941300  |
| H                                                        | 2.68830100  | 0.70522100  | -1.89508900 | C  | -0.26790900 | -3.07390900 | -0.94865600 |
| H                                                        | 2.09517000  | -0.99580200 | -2.23309000 | H  | -1.03943000 | -3.07114700 | -0.16943100 |
| C                                                        | 1.52722500  | 2.52347200  | -0.18782800 | H  | -0.16677300 | -4.08508100 | -1.35282900 |
| C                                                        | 0.86915300  | 3.55720700  | -1.13093300 | H  | 0.67425400  | -2.79738700 | -0.45479200 |
| H                                                        | 2.53976800  | 2.32376400  | -0.55071200 | C  | -0.87740800 | -2.43577900 | -3.29201300 |
| H                                                        | 1.65122700  | 2.97856900  | 0.80238600  | Pd | 2.30708700  | -0.59934000 | -0.21161900 |
| C                                                        | 1.68988300  | 4.84675600  | -1.23325100 | H  | -0.81734000 | -3.47396900 | -3.60858400 |
| H                                                        | 0.76023200  | 3.10918800  | -2.12688100 | H  | -1.15609000 | -1.70596900 | -4.04679700 |
| H                                                        | -0.14144500 | 3.78944400  | -0.77699100 | C  | -0.05731400 | 0.97334500  | 0.80373900  |
| H                                                        | 1.21631400  | 5.56463300  | -1.91052100 | H  | 0.44203100  | 1.37698000  | 1.68735100  |
| H                                                        | 1.79237500  | 5.32992300  | -0.25508200 | H  | -0.30918200 | -0.06549700 | 1.04248400  |
| H                                                        | 2.69905700  | 4.64710000  | -1.61096500 | C  | 0.92715800  | 0.97236700  | -0.36488900 |
| C                                                        | 4.57805500  | -1.95774900 | -0.66934200 | C  | 0.58785300  | 0.12667200  | -1.53948100 |
| H                                                        | 4.88806700  | -1.18838400 | -1.40144100 | C  | 1.57267400  | -0.12254500 | -2.47668800 |
| H                                                        | 5.48136600  | -2.54440200 | -0.42907400 | H  | 2.43434800  | 0.52543100  | -2.59532200 |
| H                                                        | 3.88627700  | -2.64400200 | -1.19322900 | H  | 1.41585700  | -0.87552300 | -3.24024500 |
| O                                                        | 4.05995000  | -1.43648900 | 0.51783000  | C  | 1.73188800  | 2.26283000  | -0.54253500 |
| C                                                        | 2.46202800  | -0.20316800 | 2.46040600  | C  | 0.95158600  | 3.46827100  | -1.11450200 |
| O                                                        | 2.55449900  | -0.18853200 | 3.59823200  | H  | 2.59933100  | 2.09175700  | -1.18783900 |
| <b>11</b>                                                |             |             |             | H  | 2.13682400  | 2.52868100  | 0.44030500  |
| Sum of electronic and thermal Free Energies=-1245.504075 |             |             |             | C  | 1.83873700  | 4.71239900  | -1.23127100 |
| C                                                        | -0.70217500 | -0.64114600 | -1.59458200 | H  | 0.55809000  | 3.20718600  | -2.10557400 |
| C                                                        | -0.62617800 | -2.07852100 | -2.02588100 | H  | 0.08968600  | 3.69197700  | -0.47757700 |
| C                                                        | -1.87343200 | -0.04789500 | -1.26929200 | H  | 1.28069100  | 5.56010500  | -1.64193500 |
| C                                                        | -3.18538900 | -0.80876600 | -1.24209600 | H  | 2.22847800  | 5.01259500  | -0.25223200 |
| H                                                        | -3.96611000 | -0.24467900 | -1.76118000 | H  | 2.69784400  | 4.52963000  | -1.88704300 |
| H                                                        | -3.07695500 | -1.78479100 | -1.71630400 | C  | 4.38394000  | -1.54266400 | 3.23905100  |
| C                                                        | -3.61190100 | -1.04182100 | 0.20381600  | H  | 4.89388700  | -0.61072500 | 3.49829800  |
| O                                                        | -3.09278000 | -1.84612100 | 0.94989400  | H  | 3.60950600  | -1.73824400 | 3.98568900  |

|   |            |             |            |
|---|------------|-------------|------------|
| H | 5.09547900 | -2.36829800 | 3.20279100 |
| O | 3.80669900 | -1.45772700 | 1.92038700 |
| C | 2.86127100 | -0.47076400 | 1.73889000 |
| O | 2.54303300 | 0.27165500  | 2.64502700 |

ts9

Sum of electronic and thermal Free Energies=-1245.490714

|    |             |             |             |
|----|-------------|-------------|-------------|
| C  | 0.46785200  | -0.55005600 | 1.39217000  |
| C  | 0.13221000  | -1.96243000 | 1.78249000  |
| C  | 1.74722300  | -0.13218400 | 1.25519400  |
| C  | 2.92791600  | -1.07293700 | 1.40172600  |
| H  | 3.69006100  | -0.63380000 | 2.05246800  |
| H  | 2.61149700  | -2.02852400 | 1.82170000  |
| C  | 3.53654100  | -1.34655000 | 0.02994000  |
| O  | 3.01685400  | -2.03367100 | -0.82509800 |
| O  | 4.71019600  | -0.70570300 | -0.13344800 |
| C  | 5.32645700  | -0.84144900 | -1.43899100 |
| C  | 6.63438700  | -0.07486400 | -1.40808900 |
| H  | 4.63393100  | -0.44761700 | -2.18921300 |
| H  | 5.47461000  | -1.90495000 | -1.64839300 |
| H  | 7.13168600  | -0.15286600 | -2.37982400 |
| H  | 6.46300500  | 0.98418500  | -1.19458200 |
| H  | 7.30698200  | -0.47625000 | -0.64461400 |
| C  | 2.10693800  | 1.30078400  | 0.88589700  |
| H  | 3.17124900  | 1.47633200  | 1.06336300  |
| H  | 1.56152900  | 1.98253100  | 1.55172300  |
| C  | 1.76166700  | 1.66453400  | -0.54788200 |
| C  | 2.59352800  | 2.35390200  | -1.33452300 |
| H  | 2.31406000  | 2.64194500  | -2.34416700 |
| H  | 3.58067000  | 2.65535600  | -0.99454500 |
| C  | -0.15128000 | -2.91887900 | 0.64873500  |
| H  | 0.72152400  | -2.98544800 | -0.01166200 |
| H  | -0.39819700 | -3.91697400 | 1.02139100  |
| H  | -0.98688400 | -2.56030000 | 0.03382900  |
| C  | 0.11131000  | -2.33519500 | 3.06858600  |
| Pd | -2.32510300 | -0.13498600 | -0.18685700 |
| H  | -0.13228600 | -3.35456000 | 3.35657100  |
| H  | 0.33928800  | -1.63826800 | 3.87001900  |
| C  | 0.41047600  | 1.15591300  | -1.01735400 |
| H  | 0.11468200  | 1.66503200  | -1.93901900 |
| H  | 0.53295100  | 0.09576500  | -1.26615600 |
| C  | -0.70690500 | 1.28618500  | 0.01641400  |
| C  | -0.66470200 | 0.41275000  | 1.17837200  |
| C  | -1.84274500 | 0.28952300  | 1.94047700  |
| H  | -2.52944400 | 1.12023100  | 2.06341200  |

|   |             |             |             |
|---|-------------|-------------|-------------|
| H | -1.91465800 | -0.50097600 | 2.67802700  |
| C | -1.39638300 | 2.65189300  | 0.06516600  |
| C | -0.58013100 | 3.76654600  | 0.75837300  |
| H | -2.37008100 | 2.58825700  | 0.56114700  |
| H | -1.60949600 | 2.95727600  | -0.96602600 |
| C | -1.31489800 | 5.11078100  | 0.73760600  |
| H | -0.38307500 | 3.47116300  | 1.79701800  |
| H | 0.39396500  | 3.87203000  | 0.26840500  |
| H | -0.73043200 | 5.88962300  | 1.23775900  |
| H | -1.50251400 | 5.44336500  | -0.28948500 |
| H | -2.28394200 | 5.04319900  | 1.24518700  |
| C | -4.34509800 | -2.61184100 | -0.72576400 |
| H | -4.08518000 | -3.03327300 | -1.70931100 |
| H | -3.75538500 | -3.13193900 | 0.04206300  |
| H | -5.40639000 | -2.82650500 | -0.54240100 |
| O | -4.15416800 | -1.20930100 | -0.70481700 |
| C | -3.01958200 | -0.61323600 | -2.00627300 |
| O | -3.24884000 | -0.96180000 | -3.09199600 |

16

Sum of electronic and thermal Free Energies=-1358.832696

|   |             |             |             |
|---|-------------|-------------|-------------|
| C | -0.48475000 | -0.17752400 | 0.79414700  |
| C | -0.73887900 | -0.23591800 | 2.24910700  |
| C | -1.27873700 | -0.66696500 | -0.16888900 |
| C | -2.58731000 | -1.36374900 | 0.16209300  |
| H | -2.61857400 | -2.36976600 | -0.27928400 |
| H | -2.69324100 | -1.50891500 | 1.24089500  |
| C | -3.83136800 | -0.62972200 | -0.32076000 |
| O | -3.87189700 | 0.46977500  | -0.82985800 |
| O | -4.93237100 | -1.38257400 | -0.09051400 |
| C | -6.19401300 | -0.79040400 | -0.47495100 |
| C | -7.28766000 | -1.78402400 | -0.13102100 |
| H | -6.16741300 | -0.56214900 | -1.54533300 |
| H | -6.31757600 | 0.15785500  | 0.05794600  |
| H | -8.26391100 | -1.37293700 | -0.40657000 |
| H | -7.14573500 | -2.72475500 | -0.67092300 |
| H | -7.29589100 | -2.00109900 | 0.94103000  |
| C | -1.02873300 | -0.50259200 | -1.66545300 |
| H | -1.57666900 | 0.38847100  | -1.99044500 |
| H | -1.50620700 | -1.34923700 | -2.18287900 |
| C | 0.40042300  | -0.41954600 | -2.16147600 |
| C | 0.86570900  | 0.68755000  | -2.75977400 |
| H | 1.86370100  | 0.72926800  | -3.18886900 |
| H | 0.26292300  | 1.58700800  | -2.83556300 |
| C | -1.19015500 | 1.04849900  | 2.91102000  |

|                                                          |             |             |             |    |             |             |             |
|----------------------------------------------------------|-------------|-------------|-------------|----|-------------|-------------|-------------|
| H                                                        | -2.16192500 | 1.35804100  | 2.50901300  | O  | 4.78092100  | 0.03326200  | -0.02690200 |
| H                                                        | -1.27791700 | 0.92912300  | 3.99482400  | C  | 5.51914800  | -0.55008800 | -1.12762400 |
| H                                                        | -0.49874500 | 1.86712300  | 2.69130200  | C  | 6.70627100  | 0.35101100  | -1.40994000 |
| C                                                        | -0.57019700 | -1.37163000 | 2.95272800  | H  | 4.85017700  | -0.63442100 | -1.99010000 |
| Pd                                                       | 1.20197300  | 0.89055400  | 0.32862300  | H  | 5.82634600  | -1.56212100 | -0.84802800 |
| O                                                        | -0.07599500 | 2.55261900  | 0.17092100  | H  | 7.29172800  | -0.05596600 | -2.24029700 |
| C                                                        | 0.43770300  | 3.68117600  | -0.19063400 | H  | 6.38045500  | 1.35933900  | -1.68204200 |
| O                                                        | 1.63430200  | 3.89829500  | -0.45782400 | H  | 7.35725800  | 0.42552000  | -0.53408600 |
| C                                                        | -0.57037700 | 4.82053700  | -0.27209800 | C  | 2.00793200  | 1.92222500  | 0.20940400  |
| H                                                        | -1.40653500 | 4.52704200  | -0.91243400 | H  | 3.08454200  | 2.10086000  | 0.16057400  |
| H                                                        | -0.97788500 | 5.01231800  | 0.72523400  | H  | 1.55698700  | 2.80494100  | 0.68311000  |
| H                                                        | -0.09695400 | 5.72419700  | -0.65638400 | C  | 1.45351000  | 1.79721200  | -1.18979600 |
| H                                                        | -0.75290100 | -1.40652900 | 4.02379100  | C  | 2.25521200  | 1.76293900  | -2.27068600 |
| H                                                        | -0.26012000 | -2.29588700 | 2.47345800  | H  | 1.84971600  | 1.69713800  | -3.27648600 |
| C                                                        | 1.25089700  | -1.67789200 | -2.11003900 | H  | 3.33589900  | 1.80054600  | -2.17598200 |
| H                                                        | 0.61032400  | -2.55576200 | -2.27911100 | C  | 0.42721600  | -2.31382200 | 1.70244800  |
| H                                                        | 1.95965500  | -1.66859000 | -2.94967700 | H  | 1.34559000  | -2.45417800 | 1.12040100  |
| C                                                        | 2.05740500  | -1.94296500 | -0.84864700 | H  | 0.36591200  | -3.09131000 | 2.46992300  |
| C                                                        | 2.17472400  | -1.10288200 | 0.15815600  | H  | -0.41625300 | -2.44379700 | 1.01210500  |
| C                                                        | 2.51174400  | -0.58283700 | 1.36675100  | C  | 0.37207100  | -0.75710400 | 3.64962100  |
| H                                                        | 1.94882600  | -0.84299000 | 2.26075800  | Pd | -2.29613000 | -0.79025000 | 0.57454300  |
| H                                                        | 3.46411000  | -0.07909600 | 1.51663100  | O  | -1.68663600 | -1.44190700 | -2.41905600 |
| C                                                        | 2.77238900  | -3.28965400 | -0.83311100 | C  | -2.44776700 | -2.42401000 | -1.95038600 |
| C                                                        | 3.67315900  | -3.59023800 | 0.36762200  | O  | -2.85381600 | -2.46451600 | -0.78885000 |
| H                                                        | 3.36289300  | -3.36248200 | -1.75880500 | C  | -2.75797400 | -3.48233300 | -2.97017700 |
| H                                                        | 2.00363600  | -4.07279300 | -0.91770400 | H  | -3.42738800 | -4.22568400 | -2.54005400 |
| C                                                        | 4.33509900  | -4.96847000 | 0.26661600  | H  | -3.21442300 | -3.02527600 | -3.85263900 |
| H                                                        | 4.44576000  | -2.81575200 | 0.44637200  | H  | -1.82793400 | -3.95954100 | -3.29376100 |
| H                                                        | 3.08379500  | -3.53202300 | 1.29050700  | H  | 0.31969200  | -1.60240700 | 4.33122800  |
| H                                                        | 4.97472200  | -5.16367600 | 1.13292500  | H  | 0.40094900  | 0.23256500  | 4.09673400  |
| H                                                        | 3.58650700  | -5.76747800 | 0.21948400  | C  | 0.00398800  | 1.85630500  | -1.30701500 |
| H                                                        | 4.95882800  | -5.04611700 | -0.63107700 | H  | -0.35095800 | 2.24332100  | -2.26169100 |
| C                                                        | 2.87796800  | 2.09723400  | -0.12926200 | H  | -1.52641700 | -0.80700000 | -1.67649100 |
| O                                                        | 3.94989900  | 2.43991000  | -0.34378800 | C  | -0.95394800 | 1.62631900  | -0.36366200 |
| <b>r-p3</b>                                              |             |             |             | C  | -0.79620600 | 0.87476300  | 0.92269200  |
| Sum of electronic and thermal Free Energies=-1245.545675 |             |             |             | C  | -1.87767400 | 0.85913800  | 1.83644100  |
| C                                                        | 0.50271600  | 0.25098300  | 1.38594400  | H  | -2.69774700 | 1.56125100  | 1.73461400  |
| C                                                        | 0.40102900  | -0.93517500 | 2.32191500  | H  | -1.71297500 | 0.49441500  | 2.84376500  |
| C                                                        | 1.73904000  | 0.70056900  | 1.06720800  | C  | -2.32840400 | 2.21164700  | -0.69724600 |
| C                                                        | 3.00733900  | 0.01954400  | 1.56486600  | C  | -2.51172700 | 3.65201000  | -0.17268600 |
| H                                                        | 3.67908200  | 0.76866900  | 1.99706500  | H  | -3.13796400 | 1.57629100  | -0.32306000 |
| H                                                        | 2.78133800  | -0.72399000 | 2.32808700  | H  | -2.43975500 | 2.23095700  | -1.78804700 |
| C                                                        | 3.73766800  | -0.69322100 | 0.43345600  | C  | -3.89115100 | 4.22923300  | -0.50625300 |
| O                                                        | 3.43091600  | -1.77701100 | -0.01810400 | H  | -2.35674400 | 3.67316000  | 0.91306200  |

|                                                          |             |             |             |                                                          |             |             |             |
|----------------------------------------------------------|-------------|-------------|-------------|----------------------------------------------------------|-------------|-------------|-------------|
| H                                                        | -1.72756800 | 4.28662400  | -0.60343700 | C                                                        | -4.21722900 | -1.26857200 | 0.77498700  |
| H                                                        | -3.99450400 | 5.25373000  | -0.13383700 | C                                                        | -4.96862600 | -1.12885500 | -0.55234700 |
| H                                                        | -4.06151300 | 4.25031800  | -1.58891200 | H                                                        | -4.73844700 | -0.69026600 | 1.55385700  |
| H                                                        | -4.69235500 | 3.63006700  | -0.05852700 | H                                                        | -4.28011400 | -2.31574100 | 1.10987100  |
| <b>ts14</b>                                              |             |             |             | C                                                        | -6.40229500 | -1.66264100 | -0.46066700 |
| Sum of electronic and thermal Free Energies=-1358.814726 |             |             |             | H                                                        | -4.99257600 | -0.07730600 | -0.85843100 |
| C                                                        | -0.11352800 | -0.92042300 | -0.46822300 | H                                                        | -4.42194200 | -1.66485700 | -1.33769200 |
| C                                                        | -0.04786800 | -1.41957400 | -1.87017600 | H                                                        | -6.92713600 | -1.54914700 | -1.41424200 |
| C                                                        | 0.54334500  | -1.47814300 | 0.56978000  | H                                                        | -6.41556000 | -2.72657400 | -0.19829400 |
| C                                                        | 1.44370100  | -2.69554900 | 0.37242800  | H                                                        | -6.97922800 | -1.12688600 | 0.30167800  |
| H                                                        | 1.14971600  | -3.48701600 | 1.07072100  | Pd                                                       | -0.46504500 | 1.19236400  | -0.41774900 |
| H                                                        | 1.36927100  | -3.07345900 | -0.64704800 | O                                                        | 1.17448300  | 3.77143400  | 0.21538500  |
| C                                                        | 2.89286200  | -2.35602000 | 0.69498100  | C                                                        | 1.86588800  | 2.76444400  | 0.46703700  |
| O                                                        | 3.39404800  | -2.43516000 | 1.79680400  | O                                                        | 1.50274500  | 1.53751100  | 0.31962300  |
| O                                                        | 3.55393800  | -1.92447100 | -0.39928100 | C                                                        | 3.28774900  | 2.94887800  | 0.98515700  |
| C                                                        | 4.91958400  | -1.49470100 | -0.18142300 | H                                                        | 3.44109900  | 2.33753800  | 1.87870600  |
| C                                                        | 5.48124700  | -1.05391300 | -1.51933200 | H                                                        | 3.99458100  | 2.60053100  | 0.22507500  |
| H                                                        | 5.48495200  | -2.32689000 | 0.24932500  | H                                                        | 3.48318600  | 3.99806700  | 1.20767400  |
| H                                                        | 4.91565800  | -0.68227000 | 0.55147600  | C                                                        | -0.79322500 | 3.19106400  | -0.60039700 |
| H                                                        | 6.51834700  | -0.72658200 | -1.39548900 | O                                                        | -1.31086400 | 4.19076200  | -0.81754400 |
| H                                                        | 5.46497200  | -1.87530800 | -2.24165200 | <b>ts15</b>                                              |             |             |             |
| H                                                        | 4.90486000  | -0.21997300 | -1.93011000 | Sum of electronic and thermal Free Energies=-1245.522679 |             |             |             |
| C                                                        | 0.51707100  | -0.93460900 | 1.98848300  | C                                                        | 0.30947500  | -1.39083000 | -0.94596200 |
| H                                                        | 1.27054100  | -0.14508000 | 2.07713600  | C                                                        | 0.44052800  | -1.44231300 | -2.44960300 |
| H                                                        | 0.83183400  | -1.74051000 | 2.66566700  | C                                                        | 1.41702700  | -1.48930500 | -0.17302200 |
| C                                                        | -0.82683900 | -0.42215300 | 2.44834200  | C                                                        | 2.80963700  | -1.60759000 | -0.77027700 |
| C                                                        | -0.95927300 | 0.69504300  | 3.17022000  | H                                                        | 3.35946700  | -2.40644600 | -0.26262600 |
| H                                                        | -1.92492100 | 1.02040400  | 3.54882100  | H                                                        | 2.75808200  | -1.83693500 | -1.83433300 |
| H                                                        | -0.10573000 | 1.32489600  | 3.40089300  | C                                                        | 3.59298000  | -0.30636000 | -0.62750600 |
| C                                                        | 1.01214900  | -0.80697800 | -2.76008100 | O                                                        | 3.45401900  | 0.66425600  | -1.34136900 |
| H                                                        | 2.00763200  | -0.98452300 | -2.33909100 | O                                                        | 4.46954700  | -0.35938800 | 0.39763500  |
| H                                                        | 0.97277600  | -1.22532200 | -3.77014000 | C                                                        | 5.23474100  | 0.84907900  | 0.63278200  |
| H                                                        | 0.89016300  | 0.28069800  | -2.82694400 | C                                                        | 6.21895300  | 0.55674200  | 1.74906100  |
| C                                                        | -0.88170700 | -2.37340600 | -2.31409800 | H                                                        | 4.53970600  | 1.65321900  | 0.89329000  |
| H                                                        | -0.82487900 | -2.74240600 | -3.33484000 | H                                                        | 5.73693400  | 1.13230800  | -0.29687600 |
| H                                                        | -1.63768900 | -2.81243500 | -1.67086600 | H                                                        | 6.81932100  | 1.44820600  | 1.95569500  |
| C                                                        | -2.02281300 | -1.28470000 | 2.08613500  | H                                                        | 5.69960300  | 0.27314600  | 2.66922500  |
| H                                                        | -1.70335600 | -2.33325000 | 1.97296900  | H                                                        | 6.89552200  | -0.25677600 | 1.47159700  |
| H                                                        | -2.75512300 | -1.27562500 | 2.90204100  | C                                                        | 1.38683600  | -1.45044900 | 1.34309500  |
| C                                                        | -2.74634900 | -0.87585300 | 0.81819900  | H                                                        | 2.38931100  | -1.64916800 | 1.72962200  |
| C                                                        | -2.15088900 | -0.27945100 | -0.21305300 | H                                                        | 0.72840000  | -2.24609900 | 1.71866900  |
| C                                                        | -2.32637400 | 0.61359900  | -1.27026900 | C                                                        | 0.89102300  | -0.11656300 | 1.86355400  |
| H                                                        | -2.10356900 | 0.30992500  | -2.29050700 | C                                                        | 1.71127700  | 0.74909500  | 2.47817100  |
| H                                                        | -3.05155900 | 1.41509500  | -1.15810700 | H                                                        | 1.35925200  | 1.71597100  | 2.82421600  |

|                                                          |             |             |             |    |             |             |             |
|----------------------------------------------------------|-------------|-------------|-------------|----|-------------|-------------|-------------|
| H                                                        | 2.75455200  | 0.50609300  | 2.65411900  | O  | 5.31328900  | 0.45024000  | 0.31513100  |
| C                                                        | 0.57746600  | -0.11963200 | -3.16437500 | C  | 6.37705000  | 0.47086100  | -0.66669700 |
| H                                                        | 1.48147200  | 0.39887300  | -2.82438300 | C  | 7.66443200  | 0.80280500  | 0.06343300  |
| H                                                        | 0.62627500  | -0.25626200 | -4.24864800 | H  | 6.13470100  | 1.21374900  | -1.43324800 |
| H                                                        | -0.27070800 | 0.53843600  | -2.93155300 | H  | 6.42196500  | -0.50573100 | -1.15884700 |
| C                                                        | 0.46641400  | -2.61474400 | -3.09643400 | H  | 8.49708200  | 0.82941500  | -0.64635400 |
| Pd                                                       | -2.13338500 | 0.51202800  | -0.99799100 | H  | 7.59718500  | 1.77930900  | 0.55158700  |
| O                                                        | -0.64570300 | 2.66075100  | 1.04480800  | H  | 7.88633200  | 0.05116800  | 0.82632600  |
| C                                                        | -1.43394500 | 3.21197200  | 0.20246800  | C  | 1.13283900  | 1.30032100  | -0.19688100 |
| O                                                        | -2.13102700 | 2.62150800  | -0.66618700 | H  | 1.95026900  | 1.82493700  | -0.71269400 |
| C                                                        | -1.50538000 | 4.72623100  | 0.26913900  | H  | 0.75943200  | 2.00167000  | 0.55997700  |
| H                                                        | -2.24140000 | 5.10782200  | -0.43883500 | C  | 0.03820600  | 1.03543700  | -1.21920700 |
| H                                                        | -1.75918400 | 5.04036900  | 1.28544500  | C  | 0.17198900  | -0.00379600 | -2.11240200 |
| H                                                        | -0.52022000 | 5.14264100  | 0.03697100  | H  | -0.52785300 | -0.11183400 | -2.93581800 |
| H                                                        | 0.57256100  | -2.66148500 | -4.17732700 | H  | 1.08892700  | -0.58333300 | -2.14490500 |
| H                                                        | 0.38713900  | -3.56125500 | -2.56884900 | C  | 1.49172400  | -3.50025600 | 0.25536100  |
| C                                                        | -0.57081900 | 0.13381400  | 1.72041400  | H  | 2.27952800  | -3.26745800 | -0.47121200 |
| H                                                        | -1.02685100 | 0.34826700  | 2.69134300  | H  | 1.77299200  | -4.40581300 | 0.79986800  |
| H                                                        | -0.66948800 | 1.40993600  | 1.22452300  | H  | 0.58497600  | -3.71395400 | -0.32347200 |
| C                                                        | -1.43805300 | -0.67471400 | 0.90588900  | C  | 1.41552200  | -2.45716500 | 2.52395100  |
| C                                                        | -1.08192600 | -1.26681500 | -0.39829800 | Pd | -0.93313000 | -0.94285200 | -0.38617800 |
| C                                                        | -2.17620500 | -1.61601200 | -1.23811900 | H  | 1.69824700  | -3.40326400 | 2.97786000  |
| H                                                        | -3.13298900 | -1.91511900 | -0.82661600 | H  | 1.23539800  | -1.62218800 | 3.19431500  |
| H                                                        | -1.96716600 | -1.99696600 | -2.23029600 | C  | -1.01271700 | 2.11190500  | -1.46333200 |
| C                                                        | -2.75276800 | -1.04695500 | 1.58783300  | H  | -0.54712100 | 2.84051100  | -2.14082500 |
| C                                                        | -2.59082800 | -2.30468200 | 2.47177000  | H  | -1.84966100 | 1.65484300  | -2.00351300 |
| H                                                        | -3.57428100 | -1.21033100 | 0.88891600  | C  | -1.53760800 | 2.85850300  | -0.24252800 |
| H                                                        | -3.05526300 | -0.20525000 | 2.22066900  | C  | -1.22669200 | 4.12250000  | -0.06832000 |
| C                                                        | -3.87825500 | -2.65340700 | 3.22549100  | C  | -0.91884600 | 5.38524600  | 0.07971100  |
| H                                                        | -2.28991400 | -3.14989100 | 1.83991300  | H  | -1.52894900 | 6.17616400  | -0.35282800 |
| H                                                        | -1.77452100 | -2.14350100 | 3.18612200  | H  | -0.04340400 | 5.69942400  | 0.64502800  |
| H                                                        | -3.74447100 | -3.54817800 | 3.84169800  | C  | -2.44790700 | 2.09324500  | 0.70330100  |
| H                                                        | -4.18362500 | -1.83516800 | 3.88714100  | C  | -3.02603600 | 2.89662800  | 1.87155000  |
| H                                                        | -4.70556000 | -2.84613300 | 2.53324000  | H  | -1.89113500 | 1.22706500  | 1.09318600  |
| <b>12</b>                                                |             |             |             | H  | -3.26058500 | 1.65604700  | 0.10679200  |
| Sum of electronic and thermal Free Energies=-1358.847593 |             |             |             | C  | -3.92590700 | 2.04766000  | 2.77501400  |
| C                                                        | 0.87157000  | -1.05551900 | 0.56957700  | H  | -2.20550800 | 3.32456600  | 2.46051500  |
| C                                                        | 1.27251500  | -2.33395700 | 1.19422600  | H  | -3.59180700 | 3.75027200  | 1.47833600  |
| C                                                        | 1.64715400  | 0.04143900  | 0.47209200  | H  | -4.33259300 | 2.64129100  | 3.60004100  |
| C                                                        | 3.06843800  | 0.11090400  | 0.98536200  | H  | -4.77142800 | 1.63057100  | 2.21646700  |
| H                                                        | 3.23524500  | 0.99218100  | 1.61828700  | H  | -3.37367700 | 1.20722600  | 3.21081200  |
| H                                                        | 3.30184100  | -0.75919600 | 1.60618000  | O  | -2.73984200 | -0.67119900 | -1.51371900 |
| C                                                        | 4.08374900  | 0.14916600  | -0.14981700 | C  | -3.73434500 | -1.39914000 | -1.14876100 |
| O                                                        | 3.84588700  | -0.07594300 | -1.31965900 | O  | -3.73455000 | -2.19947700 | -0.18866200 |

|   |             |             |             |
|---|-------------|-------------|-------------|
| C | -4.99306500 | -1.25787600 | -1.99380900 |
| H | -5.21576700 | -0.20070200 | -2.15940600 |
| H | -4.81616200 | -1.71326100 | -2.97373100 |
| H | -5.83677400 | -1.75416800 | -1.51409700 |
| C | -1.85439900 | -2.16620400 | 0.91311500  |
| O | -2.06899600 | -2.82918900 | 1.82189700  |

**13**

Sum of electronic and thermal Free Energies=-1358.853271

|    |             |             |             |
|----|-------------|-------------|-------------|
| C  | 1.25116700  | -1.57900400 | 0.79257200  |
| C  | 2.12479100  | -2.64617900 | 1.39482800  |
| C  | 1.65587800  | -0.29550500 | 0.64876200  |
| C  | 3.04264000  | 0.12937100  | 1.07805500  |
| H  | 3.01075800  | 1.06318700  | 1.65112300  |
| H  | 3.51092300  | -0.62034200 | 1.72060600  |
| C  | 3.95449500  | 0.33506600  | -0.12714700 |
| O  | 3.74889100  | -0.10447200 | -1.24006300 |
| O  | 5.04323000  | 1.04698900  | 0.21303800  |
| C  | 6.02099800  | 1.25668000  | -0.83801000 |
| C  | 7.14297700  | 2.09365900  | -0.25535300 |
| H  | 5.52849100  | 1.75268500  | -1.67980100 |
| H  | 6.37166000  | 0.28114600  | -1.18889300 |
| H  | 7.90465400  | 2.27354800  | -1.02023600 |
| H  | 6.77003100  | 3.06122000  | 0.09241000  |
| H  | 7.61647300  | 1.58290800  | 0.58788700  |
| C  | 0.83895400  | 0.86443600  | 0.11302700  |
| H  | 1.53784100  | 1.65297900  | -0.20240900 |
| H  | 0.29074500  | 1.31321400  | 0.95236200  |
| C  | -0.11674200 | 0.66365600  | -1.04252400 |
| C  | 0.08850100  | -0.32724700 | -2.00108700 |
| H  | -0.41890100 | -0.26308400 | -2.96058200 |
| H  | 0.96637700  | -0.96345300 | -1.96029500 |
| C  | 2.80629200  | -3.56858500 | 0.41299900  |
| H  | 3.41279400  | -2.99677700 | -0.29945800 |
| H  | 3.44779100  | -4.29020500 | 0.92603300  |
| H  | 2.06010600  | -4.12271100 | -0.16685800 |
| C  | 2.24797000  | -2.76773000 | 2.72075100  |
| Pd | -1.43828900 | -1.05739400 | -0.63967000 |
| H  | 2.86161800  | -3.54980200 | 3.15972600  |
| H  | 1.72703100  | -2.10684100 | 3.40718600  |
| C  | -0.97428800 | 1.88250400  | -1.39908100 |
| H  | -0.33772500 | 2.53639800  | -2.01009700 |
| H  | -1.80365500 | 1.55283500  | -2.03483100 |
| C  | -1.52267400 | 2.69980900  | -0.23412000 |
| C  | -1.02580400 | 3.89129700  | 0.00898600  |

|   |             |             |             |
|---|-------------|-------------|-------------|
| C | -0.53123000 | 5.08303300  | 0.22575900  |
| H | -0.94183300 | 5.96803900  | -0.25702600 |
| H | 0.30631400  | 5.24301400  | 0.90249200  |
| C | -2.66235900 | 2.10075900  | 0.57403700  |
| C | -3.21539900 | 2.98134100  | 1.69799100  |
| H | -2.32718000 | 1.13932600  | 0.99184800  |
| H | -3.46253200 | 1.82991300  | -0.12755000 |
| C | -4.36489400 | 2.30751400  | 2.45396500  |
| H | -2.40810800 | 3.23205600  | 2.39763600  |
| H | -3.55575400 | 3.93557600  | 1.27736400  |
| H | -4.74295800 | 2.94951600  | 3.25622100  |
| H | -5.20324000 | 2.08469000  | 1.78405800  |
| H | -4.04439500 | 1.36208600  | 2.90615500  |
| O | -3.50637900 | -0.43672600 | -1.47506400 |
| C | -4.02168400 | -1.16724800 | -0.57526700 |
| O | -3.28913900 | -1.78686900 | 0.27083400  |
| C | -5.52285200 | -1.31374100 | -0.47089700 |
| H | -5.86378700 | -0.89141600 | 0.47987600  |
| H | -6.01932200 | -0.80394100 | -1.29751300 |
| H | -5.78968700 | -2.37428000 | -0.46828700 |
| C | -0.06598600 | -2.10192700 | 0.31649700  |
| O | -0.39007200 | -3.25931100 | 0.43590600  |

**14**

Sum of electronic and thermal Free Energies=-1358.863830

|   |             |             |             |
|---|-------------|-------------|-------------|
| C | 1.09089600  | 0.18738100  | 1.11563600  |
| C | 1.39724900  | 0.59389900  | 2.50896400  |
| C | 1.94772700  | -0.18400000 | 0.12013300  |
| C | 3.44038400  | -0.24409900 | 0.22408800  |
| H | 3.89447200  | 0.47589100  | -0.46988500 |
| H | 3.77442000  | 0.04611400  | 1.22521900  |
| C | 4.02916500  | -1.61726700 | -0.08889100 |
| O | 3.40069900  | -2.63975500 | -0.25719800 |
| O | 5.37171600  | -1.54020300 | -0.13100200 |
| C | 6.07234000  | -2.78616100 | -0.37981800 |
| C | 7.55752200  | -2.48101600 | -0.37645700 |
| H | 5.73484000  | -3.19109100 | -1.33870900 |
| H | 5.79540500  | -3.50424900 | 0.39796000  |
| H | 8.12319300  | -3.39939600 | -0.56105500 |
| H | 7.81131300  | -1.75835800 | -1.15718300 |
| H | 7.87136200  | -2.07196100 | 0.58805100  |
| C | 1.23207600  | -0.58567500 | -1.15105900 |
| H | 1.35165100  | -1.66454500 | -1.29791200 |
| H | 1.66613700  | -0.08770800 | -2.02544900 |
| C | -0.24746100 | -0.20524700 | -0.89924800 |



|                                                          |             |             |             |    |             |             |             |
|----------------------------------------------------------|-------------|-------------|-------------|----|-------------|-------------|-------------|
| C                                                        | -1.32940400 | -1.27727700 | -1.15509500 | H  | -4.45478000 | -0.39964900 | 1.71312800  |
| H                                                        | -1.65881700 | -1.31226100 | -2.19729500 | H  | -5.01745600 | 1.03113600  | 0.87538000  |
| H                                                        | -0.99541800 | -2.27318100 | -0.84165600 | C  | -4.93016600 | -0.71973900 | -0.33771100 |
| C                                                        | 0.73085800  | -0.19877900 | 3.60918600  | O  | -4.39546500 | -0.96679200 | -1.39774300 |
| H                                                        | 1.01387500  | -1.25695700 | 3.55405500  | O  | -6.14483300 | -1.18089000 | 0.01666900  |
| H                                                        | 1.01191500  | 0.18464300  | 4.59324000  | C  | -6.82464600 | -2.00238700 | -0.96535900 |
| H                                                        | -0.35779200 | -0.15534200 | 3.50746700  | C  | -8.16141000 | -2.40604900 | -0.37397700 |
| C                                                        | 2.21252800  | 1.62958800  | 2.75661400  | H  | -6.19567800 | -2.86828800 | -1.19414100 |
| Pd                                                       | -2.89419400 | -0.82214600 | 0.05427800  | H  | -6.93836800 | -1.42459600 | -1.88772500 |
| H                                                        | 2.44037900  | 1.93385300  | 3.77414300  | H  | -8.70758100 | -3.03051400 | -1.08765400 |
| H                                                        | 2.65369600  | 2.21744600  | 1.95740300  | H  | -8.02536300 | -2.97726600 | 0.54876300  |
| C                                                        | -0.64347700 | 1.09912400  | -1.68205400 | H  | -8.77170700 | -1.52689800 | -0.14879600 |
| H                                                        | -0.62687200 | 0.82691100  | -2.74166300 | C  | -1.84977900 | -0.43757800 | 0.34486300  |
| H                                                        | -1.68488500 | 1.32788100  | -1.42682500 | H  | -2.09704900 | -1.07693900 | -0.50842600 |
| C                                                        | 0.20890200  | 2.33948300  | -1.45488300 | H  | -1.78800700 | -1.09718600 | 1.22186100  |
| C                                                        | 1.21286200  | 2.61345600  | -2.25716200 | C  | -0.55515100 | 0.38072300  | 0.12888900  |
| C                                                        | 2.19276800  | 2.88795000  | -3.08038600 | C  | 0.13852900  | 0.09166700  | -1.22975500 |
| H                                                        | 2.03342200  | 3.48100500  | -3.97932300 | H  | -0.56248200 | -0.29428300 | -1.97746600 |
| H                                                        | 3.21010900  | 2.54289900  | -2.90342800 | H  | 0.58315800  | 1.00745400  | -1.63335500 |
| C                                                        | -0.19546100 | 3.26118100  | -0.31223600 | C  | -3.09023700 | 4.15625100  | -0.42587900 |
| C                                                        | 0.70251800  | 4.48009100  | -0.08185200 | H  | -3.40784500 | 3.75064800  | -1.39423100 |
| H                                                        | -0.25500700 | 2.67673500  | 0.61615500  | H  | -3.68317400 | 5.04955000  | -0.21327000 |
| H                                                        | -1.22629000 | 3.59457600  | -0.50462500 | H  | -2.03795800 | 4.43904000  | -0.52468400 |
| C                                                        | 0.22396600  | 5.34448900  | 1.08848000  | C  | -4.00245800 | 3.34348500  | 1.75467300  |
| H                                                        | 1.73056200  | 4.14300100  | 0.10222100  | Pd | 3.18537100  | -0.14876800 | -0.51494700 |
| H                                                        | 0.74312600  | 5.08040700  | -0.99873000 | H  | -4.55314800 | 4.27155400  | 1.87949800  |
| H                                                        | 0.87528900  | 6.21256000  | 1.23213500  | H  | -4.06880600 | 2.62237400  | 2.56375100  |
| H                                                        | -0.79278400 | 5.71645100  | 0.91917500  | C  | 0.55776900  | 0.07141600  | 1.16975600  |
| H                                                        | 0.21545800  | 4.77475500  | 2.02452300  | H  | 1.13806700  | 0.97824800  | 1.37534300  |
| O                                                        | -4.45537400 | -1.65025300 | -1.01432900 | H  | 0.14404600  | -0.27334500 | 2.12413400  |
| C                                                        | -5.35841300 | -1.32869700 | -0.14768000 | C  | 1.44631900  | -0.98880400 | 0.51061100  |
| O                                                        | -5.03934000 | -0.70313700 | 0.89555600  | C  | 1.20982600  | -0.94097800 | -0.89907900 |
| C                                                        | -6.78140800 | -1.74791200 | -0.42437000 | C  | 2.12750100  | -1.46300600 | -1.83999600 |
| H                                                        | -7.03851700 | -1.54473500 | -1.46704700 | H  | 2.63398500  | -2.40832800 | -1.68184400 |
| H                                                        | -6.87726400 | -2.82703400 | -0.26436900 | H  | 2.02971500  | -1.16011300 | -2.87929600 |
| H                                                        | -7.46471000 | -1.22499300 | 0.24598000  | C  | 1.90114400  | -2.12398100 | 1.41040200  |
| C                                                        | -0.26371800 | 0.03828500  | 0.58686400  | C  | 2.72334500  | -3.28402500 | 0.83539900  |
| O                                                        | -1.33193100 | 0.02617700  | 1.23547100  | H  | 0.98441300  | -2.54088100 | 1.86120200  |
| <b>15</b>                                                |             |             |             | H  | 2.45078500  | -1.67557900 | 2.24906200  |
| Sum of electronic and thermal Free Energies=-1358.917089 |             |             |             | C  | 3.04819800  | -4.33176500 | 1.90608300  |
| C                                                        | -2.48788600 | 1.86404000  | 0.50165100  | H  | 2.16955700  | -3.76305200 | 0.01865900  |
| C                                                        | -3.24591100 | 3.12642900  | 0.66867000  | H  | 3.65626300  | -2.89979600 | 0.40707200  |
| C                                                        | -2.94379300 | 0.58810200  | 0.54601100  | H  | 3.63191300  | -5.15666300 | 1.48606900  |
| C                                                        | -4.36290800 | 0.15977400  | 0.77218200  | H  | 3.63148900  | -3.89411800 | 2.72388600  |

|   |             |             |             |
|---|-------------|-------------|-------------|
| H | 2.13539700  | -4.75673600 | 2.33961600  |
| O | 5.10922400  | 0.63419800  | -1.21914800 |
| C | 5.28328100  | 1.20049600  | -0.09159200 |
| O | 4.42206000  | 1.05584600  | 0.83628900  |
| C | 6.49371100  | 2.07371600  | 0.13290400  |
| H | 7.33848500  | 1.71061900  | -0.45571200 |
| H | 6.26172200  | 3.09242900  | -0.19667900 |
| H | 6.74845700  | 2.10644900  | 1.19372900  |
| C | -1.02841100 | 1.84388800  | 0.21816800  |
| O | -0.29552500 | 2.80739300  | 0.07245800  |

**R-P2**

Sum of electronic and thermal Free Energies=-1474.592292

|    |             |             |             |
|----|-------------|-------------|-------------|
| C  | -2.31891000 | 1.44743900  | 0.17466700  |
| C  | -2.69912100 | 2.87157300  | 0.32830000  |
| C  | -3.08356400 | 0.34495300  | 0.36244000  |
| C  | -4.51889400 | 0.31947200  | 0.79390000  |
| H  | -4.61648900 | -0.15929800 | 1.77773600  |
| H  | -4.90467000 | 1.33720000  | 0.91485900  |
| C  | -5.44614000 | -0.41984200 | -0.16418500 |
| O  | -5.16019000 | -0.81896500 | -1.27262100 |
| O  | -6.66758700 | -0.55597200 | 0.39022600  |
| C  | -7.66765000 | -1.20794100 | -0.43040600 |
| C  | -8.95315800 | -1.25801600 | 0.37277200  |
| H  | -7.30776200 | -2.20683800 | -0.69595100 |
| H  | -7.78325600 | -0.64207700 | -1.36003600 |
| H  | -9.73777400 | -1.74492600 | -0.21459000 |
| H  | -8.81493400 | -1.82433700 | 1.29822700  |
| H  | -9.29232300 | -0.25109800 | 0.63215300  |
| C  | -2.33344700 | -0.93183000 | 0.05917100  |
| H  | -2.75210900 | -1.37748100 | -0.85074800 |
| H  | -2.46321900 | -1.67445800 | 0.85716000  |
| C  | -0.85935300 | -0.51083000 | -0.13601800 |
| C  | -0.12551100 | -1.19058300 | -1.32261400 |
| H  | -0.63807000 | -2.13091300 | -1.58363100 |
| H  | -0.14046800 | -0.56572600 | -2.22267400 |
| C  | -2.49184700 | 3.76296300  | -0.87389800 |
| H  | -3.07342000 | 3.40296900  | -1.73155500 |
| H  | -2.79272000 | 4.79154900  | -0.65776700 |
| H  | -1.43968100 | 3.74914500  | -1.17253100 |
| C  | -3.18280800 | 3.33590900  | 1.49005200  |
| Pd | 2.33342300  | 0.33491300  | -0.46181900 |
| H  | -3.46193000 | 4.37945900  | 1.60605000  |
| H  | -3.28526500 | 2.70055600  | 2.36464300  |
| C  | 0.04136000  | -0.83186900 | 1.10918900  |

|   |             |             |             |
|---|-------------|-------------|-------------|
| H | 0.13457300  | 0.02158600  | 1.78921700  |
| H | -0.41563900 | -1.64485200 | 1.69646400  |
| C | 1.37889100  | -1.32386000 | 0.55911600  |
| C | 1.28708000  | -1.50590800 | -0.83668800 |
| C | 2.00970300  | -2.55031500 | -1.67640500 |
| H | 1.50637900  | -3.51696000 | -1.51161800 |
| H | 1.87356500  | -2.30737600 | -2.74188900 |
| C | 2.27689300  | -2.10923100 | 1.49550900  |
| C | 2.75458200  | -1.35358700 | 2.74608000  |
| H | 3.13554700  | -2.48821000 | 0.93624700  |
| H | 1.70695900  | -2.99500700 | 1.83055200  |
| C | 3.61214600  | -2.22565400 | 3.66872000  |
| H | 3.32622900  | -0.47185200 | 2.43067400  |
| H | 1.89049200  | -0.97175200 | 3.30547500  |
| H | 3.94543300  | -1.66829900 | 4.55050400  |
| H | 3.05450900  | -3.10172500 | 4.02027200  |
| H | 4.50488000  | -2.59182700 | 3.14890600  |
| O | 5.18618300  | 0.67251500  | 0.36811800  |
| C | 4.80001200  | 1.90337700  | 0.06074400  |
| O | 3.66519300  | 2.15950800  | -0.34674500 |
| C | 5.86168900  | 2.94882500  | 0.25680000  |
| H | 6.16423400  | 2.96992100  | 1.30804700  |
| H | 6.74706300  | 2.69238000  | -0.33199400 |
| H | 5.48074800  | 3.92455200  | -0.04126500 |
| C | -0.97448900 | 1.01671700  | -0.30328700 |
| O | -0.10663000 | 1.74832900  | -0.75591200 |
| C | 4.26646400  | -2.03348500 | -2.21576900 |
| H | 4.13673000  | -2.28484300 | -3.28013300 |
| H | 4.12320800  | -0.95026800 | -2.08638100 |
| H | 5.28242200  | -2.29933700 | -1.91200100 |
| O | 3.38143400  | -2.77831800 | -1.39949800 |
| H | 4.37848100  | 0.08772400  | 0.19354800  |

**ts3coinsertion11fixopt-2ircf**

Sum of electronic and thermal Free Energies=-1358.842803

|   |             |             |             |
|---|-------------|-------------|-------------|
| C | -0.79032300 | -1.68928800 | -0.19027100 |
| C | -1.20782400 | -3.08785200 | 0.02117600  |
| C | -1.49883800 | -0.64996400 | -0.65695000 |
| C | -2.93001500 | -0.83486800 | -1.15835200 |
| H | -3.02530900 | -0.39597800 | -2.15634000 |
| H | -3.18018400 | -1.89575400 | -1.20371900 |
| C | -3.93765100 | -0.17292100 | -0.22996600 |
| O | -4.26879400 | -0.60637000 | 0.85583000  |
| O | -4.41155000 | 0.97621700  | -0.75008400 |
| C | -5.33036600 | 1.71970800  | 0.08707800  |

|   |             |             |             |                                                          |             |             |             |
|---|-------------|-------------|-------------|----------------------------------------------------------|-------------|-------------|-------------|
| C | -5.77095900 | 2.94235200  | -0.69470200 | H                                                        | 3.77079300  | -0.98190000 | -3.53093900 |
| H | -4.81448700 | 1.98627600  | 1.01477200  | Pd                                                       | 1.20720100  | -1.38087600 | 0.16727700  |
| H | -6.17161800 | 1.07114400  | 0.34951000  | C                                                        | 0.81344500  | -1.53138200 | 2.01681600  |
| H | -6.46796900 | 3.53523400  | -0.09426600 | O                                                        | 0.60507000  | -1.61053400 | 3.13700700  |
| H | -4.91478600 | 3.57330700  | -0.95010800 | <b>TS10</b>                                              |             |             |             |
| H | -6.27503200 | 2.65395900  | -1.62163400 | Sum of electronic and thermal Free Energies=-1358.824486 |             |             |             |
| C | -0.93943500 | 0.75635300  | -0.79700600 | C                                                        | 0.69741900  | -1.80881800 | 0.25635900  |
| H | -1.51109900 | 1.28430200  | -1.57365500 | C                                                        | 1.06750700  | -3.24952700 | 0.31669400  |
| H | 0.08518500  | 0.70759400  | -1.18361200 | C                                                        | -0.42574700 | -1.27419000 | -0.29408000 |
| C | -0.93680000 | 1.64507200  | 0.43884700  | C                                                        | -1.41670300 | -2.13882400 | -1.05880800 |
| C | -1.44279400 | 1.29531800  | 1.62697200  | H                                                        | -1.64592900 | -1.65285800 | -2.01130600 |
| H | -1.42169300 | 1.98440600  | 2.46709900  | H                                                        | -0.97619400 | -3.11931100 | -1.25313100 |
| H | -1.90789000 | 0.33025200  | 1.79666100  | C                                                        | -2.72848200 | -2.39356500 | -0.31870000 |
| C | -0.39769400 | -4.16336400 | -0.67230000 | O                                                        | -2.83629100 | -3.04552600 | 0.69837200  |
| H | 0.64651700  | -4.15680100 | -0.33713700 | O                                                        | -3.76748100 | -1.83129200 | -0.96309600 |
| H | -0.81284000 | -5.15586300 | -0.47713500 | C                                                        | -5.06541200 | -2.01279600 | -0.34327000 |
| H | -0.37900300 | -3.99712300 | -1.75554900 | C                                                        | -6.09448100 | -1.34602000 | -1.23521400 |
| C | -2.25895700 | -3.38876000 | 0.80614600  | H                                                        | -5.03415500 | -1.57029900 | 0.65722000  |
| H | -2.56551800 | -4.42233800 | 0.94827700  | H                                                        | -5.25065800 | -3.08464400 | -0.22611400 |
| H | -2.84918400 | -2.62100300 | 1.29565300  | H                                                        | -7.09186200 | -1.46364300 | -0.80038600 |
| C | -0.30427500 | 3.01153800  | 0.21693300  | H                                                        | -5.88964500 | -0.27669000 | -1.33979800 |
| H | -0.75441800 | 3.48142700  | -0.66540900 | H                                                        | -6.09934800 | -1.79545200 | -2.23231900 |
| H | -0.52390600 | 3.65438700  | 1.07807100  | C                                                        | -0.74981500 | 0.20708000  | -0.28514300 |
| C | 1.21372700  | 2.94700100  | 0.02471000  | H                                                        | -0.89611900 | 0.52197400  | -1.32606600 |
| C | 1.73395200  | 3.06300700  | -1.17427500 | H                                                        | 0.11402300  | 0.78455800  | 0.06449800  |
| C | 2.22093700  | 3.18538300  | -2.38334100 | C                                                        | -1.97916800 | 0.60864200  | 0.52764300  |
| H | 2.50648800  | 4.15341700  | -2.79130800 | C                                                        | -2.24972200 | 0.08016200  | 1.72607100  |
| H | 2.35347800  | 2.32266600  | -3.03391500 | H                                                        | -3.10721400 | 0.41362600  | 2.30414000  |
| C | 2.04324000  | 2.74595000  | 1.28180800  | H                                                        | -1.64067300 | -0.70015100 | 2.17029400  |
| C | 3.53375900  | 2.46571900  | 1.06789700  | C                                                        | 2.40089400  | -3.64524700 | -0.27585300 |
| H | 1.59295800  | 1.92590900  | 1.85848100  | H                                                        | 3.23068000  | -3.14141400 | 0.23597000  |
| H | 1.92107300  | 3.64290000  | 1.90991000  | H                                                        | 2.55820500  | -4.72414500 | -0.19542900 |
| C | 4.30144400  | 2.35660600  | 2.38917400  | H                                                        | 2.46672700  | -3.35757900 | -1.33135500 |
| H | 3.64673200  | 1.53471100  | 0.50087500  | C                                                        | 0.25661100  | -4.14152300 | 0.90846700  |
| H | 3.96808400  | 3.26275700  | 0.45193400  | H                                                        | 0.53395000  | -5.19153300 | 0.95500200  |
| H | 5.36193800  | 2.14919900  | 2.21447300  | H                                                        | -0.69818300 | -3.85883500 | 1.33838200  |
| H | 4.23423400  | 3.28408200  | 2.97011400  | C                                                        | -2.84063100 | 1.69763800  | -0.08526600 |
| H | 3.90590200  | 1.54636200  | 3.01273800  | H                                                        | -3.22268300 | 1.35008700  | -1.05226200 |
| O | 1.83723500  | -1.10680300 | -1.84430400 | H                                                        | -3.70584100 | 1.87756200  | 0.56546200  |
| C | 3.06369300  | -0.93443200 | -1.50256600 | C                                                        | -2.09090500 | 3.01455200  | -0.29010800 |
| O | 3.39123800  | -1.01258700 | -0.28020900 | C                                                        | -1.78757900 | 3.42363600  | -1.49968400 |
| C | 4.08573300  | -0.60299300 | -2.55710900 | C                                                        | -1.50269700 | 3.82000500  | -2.71376300 |
| H | 4.18188300  | 0.48666900  | -2.61960300 | H                                                        | -2.18386900 | 4.44944500  | -3.28366600 |
| H | 5.05883400  | -1.01237800 | -2.27921200 | H                                                        | -0.57056600 | 3.54303500  | -3.20269600 |

|    |             |             |             |    |             |             |             |
|----|-------------|-------------|-------------|----|-------------|-------------|-------------|
| C  | -1.73229800 | 3.78955700  | 0.96702500  | H  | 1.26612000  | -0.44506500 | -2.90318500 |
| C  | -0.89524500 | 5.05457100  | 0.75669800  | C  | 0.64773100  | -0.58296300 | 3.24406100  |
| H  | -1.20845500 | 3.10894000  | 1.65354200  | H  | 1.61527400  | -0.19784400 | 2.90705600  |
| H  | -2.67009400 | 4.05034700  | 1.48238400  | H  | 0.54830800  | -0.42064000 | 4.32039900  |
| C  | -0.58793300 | 5.78028900  | 2.07010500  | H  | 0.66517200  | -1.66130900 | 3.05468800  |
| H  | 0.04146900  | 4.78697900  | 0.25273200  | C  | -1.55365900 | 0.59937600  | 3.12423100  |
| H  | -1.42383400 | 5.73004000  | 0.07318300  | Pd | 1.80445000  | -1.33362100 | -0.57013200 |
| H  | 0.01210400  | 6.67886400  | 1.89468300  | H  | -1.61002600 | 0.62065300  | 4.20890100  |
| H  | -1.50768200 | 6.08975000  | 2.57988500  | H  | -2.40127600 | 1.00637900  | 2.58162400  |
| H  | -0.02844600 | 5.13739400  | 2.75909700  | C  | -1.64300000 | -1.69507800 | -1.80616500 |
| O  | 3.55276800  | -0.02734200 | -1.70034600 | H  | -1.77768400 | -1.62381400 | -2.89042800 |
| C  | 4.31549900  | 0.73305800  | -1.03001300 | H  | -1.39193600 | -2.73524100 | -1.57708900 |
| O  | 4.12173700  | 0.89064500  | 0.22553900  | C  | -2.97013600 | -1.33492500 | -1.13624700 |
| C  | 5.44494500  | 1.47908400  | -1.69663900 | C  | -3.70137500 | -0.35787400 | -1.62460100 |
| H  | 5.17971400  | 2.53901800  | -1.77181000 | C  | -4.43455400 | 0.60059800  | -2.13219000 |
| H  | 6.34982100  | 1.40950600  | -1.08779700 | H  | -5.15966000 | 0.40731700  | -2.92101700 |
| H  | 5.62569600  | 1.08323100  | -2.69681100 | H  | -4.36065500 | 1.63018800  | -1.78581500 |
| Pd | 2.41551900  | -0.44159800 | 0.17746000  | C  | -3.45922500 | -2.19696800 | 0.02250700  |
| C  | 1.39961300  | -0.90608400 | 1.66165600  | C  | -4.85362400 | -1.85867300 | 0.55765100  |
| O  | 1.05565900  | -0.97828200 | 2.77406200  | H  | -2.72970300 | -2.15127700 | 0.83899400  |

#### TS11

Sum of electronic and thermal Free Energies=-1358.823054

|   |             |             |             |                                                          |             |             |             |
|---|-------------|-------------|-------------|----------------------------------------------------------|-------------|-------------|-------------|
| C | -0.43085600 | 0.02620600  | 1.01356400  | C                                                        | -5.27753400 | -2.78542200 | 1.70143000  |
| C | -0.49715500 | 0.05966900  | 2.49764000  | H                                                        | -4.86791700 | -0.81680600 | 0.90142400  |
| C | -0.59719300 | 1.04672400  | 0.13607700  | H                                                        | -5.58415700 | -1.91650300 | -0.25862600 |
| C | -0.84662700 | 2.47749800  | 0.51602600  | H                                                        | -6.27509400 | -2.52746000 | 2.07142400  |
| H | -1.85731100 | 2.78779500  | 0.21745700  | H                                                        | -5.30413200 | -3.83187800 | 1.37683200  |
| H | -0.80357600 | 2.60399000  | 1.60142900  | H                                                        | -4.58150700 | -2.72005600 | 2.54518800  |
| C | 0.13188900  | 3.47181100  | -0.10485800 | O                                                        | 3.89301900  | -1.55476500 | -0.94930700 |
| O | 1.09824300  | 3.20210900  | -0.78498300 | C                                                        | 4.18675700  | -1.51715100 | 0.29929300  |
| O | -0.22495700 | 4.72648600  | 0.22940900  | O                                                        | 3.27951400  | -1.38355000 | 1.16902800  |
| C | 0.63955300  | 5.78360700  | -0.25873400 | C                                                        | 5.63653600  | -1.65891200 | 0.69929200  |
| C | 0.07004300  | 7.10018600  | 0.23274600  | H                                                        | 5.95365300  | -2.69501400 | 0.54110600  |
| H | 0.67549700  | 5.73066400  | -1.35121100 | H                                                        | 6.26320400  | -1.02285800 | 0.06900400  |
| H | 1.65304400  | 5.60649400  | 0.11371100  | H                                                        | 5.76829000  | -1.40077200 | 1.75081500  |
| H | 0.69710300  | 7.92651000  | -0.11590000 | C                                                        | -0.17673400 | -1.26510200 | 0.33615900  |
| H | -0.94425100 | 7.25493200  | -0.14620300 | O                                                        | -0.38283400 | -2.38595100 | 0.75486200  |
| H | 0.03857800  | 7.12985500  | 1.32555200  |                                                          |             |             |             |
| C | -0.57493100 | 0.67180900  | -1.32639300 | <b>TS12</b>                                              |             |             |             |
| H | 0.20996200  | 1.24124300  | -1.83161300 | Sum of electronic and thermal Free Energies=-1358.849474 |             |             |             |
| H | -1.53115800 | 0.97004200  | -1.77756800 | C                                                        | 2.20147400  | -2.43973000 | -0.20005100 |
| C | -0.37664600 | -0.83151700 | -1.49547300 | C                                                        | 3.32353100  | -3.32443000 | -0.59543800 |
| C | 0.78353100  | -1.22036900 | -2.30745800 | C                                                        | 2.21771300  | -1.35384300 | 0.61361300  |
| H | 0.74127400  | -2.18915200 | -2.80751600 | C                                                        | 3.42541800  | -0.77583500 | 1.29995100  |
|   |             |             |             | H                                                        | 3.27868000  | -0.81573200 | 2.38621200  |
|   |             |             |             | H                                                        | 4.31730600  | -1.34496000 | 1.03653500  |

|    |             |             |             |                                                          |             |             |             |
|----|-------------|-------------|-------------|----------------------------------------------------------|-------------|-------------|-------------|
| C  | 3.65903900  | 0.67959800  | 0.89834300  | C                                                        | -0.36660200 | 3.57351400  | -0.87464900 |
| O  | 4.36543800  | 1.02841500  | -0.02042200 | O                                                        | 0.39895800  | 2.55934200  | -0.83551300 |
| O  | 2.96216500  | 1.51738100  | 1.68863300  | C                                                        | 0.20913900  | 4.96893400  | -0.91390600 |
| C  | 3.01950200  | 2.92428500  | 1.32921400  | H                                                        | 1.14950900  | 4.97421900  | -1.46889700 |
| C  | 2.26971700  | 3.69158900  | 2.40085500  | H                                                        | -0.50344400 | 5.66323300  | -1.36224700 |
| H  | 2.55426800  | 3.03787500  | 0.34692700  | H                                                        | 0.41449000  | 5.30093500  | 0.10982500  |
| H  | 4.06930700  | 3.22367500  | 1.26123400  | C                                                        | 0.81958600  | -2.65742800 | -0.68642700 |
| H  | 2.30192000  | 4.76311300  | 2.17857400  | O                                                        | 0.42662100  | -3.53639200 | -1.43462900 |
| H  | 1.22207600  | 3.37933200  | 2.43923400  | <b>TS13</b>                                              |             |             |             |
| H  | 2.71607200  | 3.53438400  | 3.38732400  | Sum of electronic and thermal Free Energies=-1474.552839 |             |             |             |
| C  | 0.85766000  | -0.71032500 | 0.77325900  | C                                                        | -3.00932100 | 1.92256400  | 0.55630100  |
| H  | 0.88345700  | 0.33147300  | 0.43430200  | C                                                        | -3.90668900 | 3.07167200  | 0.29473100  |
| H  | 0.57529800  | -0.66731100 | 1.83337800  | C                                                        | -3.32699500 | 0.61620800  | 0.73008000  |
| C  | -0.11191700 | -1.58009800 | -0.05808600 | C                                                        | -4.69353500 | 0.00814000  | 0.63433600  |
| C  | -0.79538200 | -0.82049700 | -1.19100100 | H                                                        | -4.98544100 | -0.46701900 | 1.58042200  |
| H  | -0.08089800 | -0.21941000 | -1.76992200 | H                                                        | -5.44823500 | 0.77500500  | 0.43316000  |
| H  | -1.30308400 | -1.48187200 | -1.89222400 | C                                                        | -4.79778500 | -1.04691900 | -0.46312700 |
| C  | 3.54162200  | -3.50970800 | -2.07858000 | O                                                        | -3.94331600 | -1.30458400 | -1.28509200 |
| H  | 3.75555100  | -2.54942300 | -2.56324800 | O                                                        | -5.99796800 | -1.65390300 | -0.41073700 |
| H  | 4.37670000  | -4.18796800 | -2.27196200 | C                                                        | -6.25112800 | -2.65477900 | -1.42857400 |
| H  | 2.63771500  | -3.91520900 | -2.54341400 | C                                                        | -7.64993500 | -3.19332900 | -1.19887500 |
| C  | 4.07858500  | -3.93947700 | 0.32555400  | H                                                        | -5.48906400 | -3.43624600 | -1.34881300 |
| Pd | -1.48286200 | 1.28090300  | -0.81107200 | H                                                        | -6.14391100 | -2.18860000 | -2.41279400 |
| H  | 4.89951300  | -4.58957300 | 0.03660800  | H                                                        | -7.88115900 | -3.95392000 | -1.95092500 |
| H  | 3.88854100  | -3.83297400 | 1.38928000  | H                                                        | -7.73634700 | -3.65085600 | -0.20922200 |
| C  | -1.20960000 | -2.29156900 | 0.76486400  | H                                                        | -8.39409400 | -2.39564400 | -1.27634200 |
| H  | -1.35633200 | -3.30789400 | 0.37122200  | C                                                        | -2.12172800 | -0.23860700 | 1.06072200  |
| H  | -0.91926700 | -2.40601200 | 1.81691500  | H                                                        | -2.11499300 | -1.16237600 | 0.47534900  |
| C  | -2.51903400 | -1.55950400 | 0.62084200  | H                                                        | -2.17002700 | -0.53227200 | 2.11973400  |
| C  | -2.58397800 | -0.52313500 | -0.20999800 | C                                                        | -0.90559000 | 0.67158000  | 0.77992000  |
| C  | -3.37870000 | 0.50326900  | -0.75877700 | C                                                        | -0.19915700 | 0.27717600  | -0.55068200 |
| H  | -3.77234100 | 0.38880200  | -1.77010300 | H                                                        | -0.89302100 | -0.21622400 | -1.24157300 |
| H  | -3.97529400 | 1.13526800  | -0.10316200 | H                                                        | 0.18534200  | 1.17115300  | -1.05061500 |
| C  | -3.71751800 | -2.18747100 | 1.30519600  | C                                                        | -3.55327200 | 3.94890700  | -0.88346400 |
| C  | -5.07772000 | -1.50297500 | 1.13808500  | H                                                        | -3.54638600 | 3.37062600  | -1.81551900 |
| H  | -3.48140400 | -2.26020700 | 2.37786800  | H                                                        | -4.26567100 | 4.77087400  | -0.99157100 |
| H  | -3.78934700 | -3.23068200 | 0.96043100  | H                                                        | -2.54851900 | 4.36176000  | -0.75193400 |
| C  | -6.19547500 | -2.25563200 | 1.86760800  | C                                                        | -4.95510800 | 3.32890400  | 1.09081100  |
| H  | -5.02023400 | -0.47606200 | 1.51775000  | Pd                                                       | 2.81655900  | 0.38773000  | 0.28019500  |
| H  | -5.32189400 | -1.42664500 | 0.07192400  | H                                                        | -5.60881900 | 4.17611700  | 0.90355700  |
| H  | -7.15960500 | -1.75480600 | 1.73648500  | H                                                        | -5.17133600 | 2.72759100  | 1.96860500  |
| H  | -6.29805400 | -3.27915600 | 1.48973800  | C                                                        | 0.22967400  | 0.59052600  | 1.82471700  |
| H  | -5.99716900 | -2.31840300 | 2.94362000  | H                                                        | 0.72754900  | 1.56807000  | 1.88828000  |
| O  | -1.63477500 | 3.42541400  | -0.85978700 | H                                                        | -0.14593400 | 0.35191400  | 2.82676600  |

|   |             |             |             |
|---|-------------|-------------|-------------|
| C | 1.20851000  | -0.46782600 | 1.30334900  |
| C | 0.93618700  | -0.65249300 | -0.10589200 |
| C | 1.42919900  | -1.67452300 | -0.95727400 |
| H | 2.05253900  | -2.46010100 | -0.55565700 |
| H | 0.82038600  | -1.96290000 | -1.80847000 |
| C | 1.69972500  | -1.44959500 | 2.35645100  |
| C | 2.62750000  | -2.61169500 | 1.97508600  |
| H | 0.80894100  | -1.86320700 | 2.85941800  |
| H | 2.19930500  | -0.84610300 | 3.12891100  |
| C | 3.15442600  | -3.34625600 | 3.21306900  |
| H | 2.08691700  | -3.32828000 | 1.34451500  |
| H | 3.47066300  | -2.23417300 | 1.38496200  |
| H | 3.79226900  | -4.18952200 | 2.93095600  |
| H | 3.74756600  | -2.67696200 | 3.84614300  |
| H | 2.33291700  | -3.73905500 | 3.82366100  |
| O | 5.09757000  | -0.55612900 | -1.75885500 |
| C | 5.44717700  | 0.46317100  | -1.10121900 |
| O | 4.69874200  | 1.16256100  | -0.34398200 |
| C | 6.88856900  | 0.93360600  | -1.23300000 |
| H | 7.48904400  | 0.20348600  | -1.77678700 |
| H | 6.90670200  | 1.88827800  | -1.76928400 |
| H | 7.31415800  | 1.11297800  | -0.24199900 |
| C | -1.53030800 | 2.07075900  | 0.64962700  |
| O | -0.89328600 | 3.10927000  | 0.59820300  |
| C | 2.37472200  | -0.23760000 | -3.25500000 |
| H | 1.44146200  | -0.54005300 | -3.74041700 |
| H | 2.22455200  | 0.71640700  | -2.73325400 |
| H | 3.14478600  | -0.10258600 | -4.02168700 |
| O | 2.78168400  | -1.26794400 | -2.36066000 |
| H | 3.71788500  | -0.97546700 | -1.97013200 |
